# Supplementary material for: The CRTC1-MAML2 fusion is the major oncogenic driver in mucoepidermoid carcinoma
Source: JCI journal article supplement (doi:10.1172/jci.insight.139497), 2021-04-07
Supplement: sd1 [file 1]

## Supplemental Information

|              |   |
|--------------|---|
| Outline..... | 1 |
|--------------|---|

### Supplemental Figures (S1-S13)

|                                                                                                                                                                                                                     |    |
|---------------------------------------------------------------------------------------------------------------------------------------------------------------------------------------------------------------------|----|
| <b>Figure S1:</b> A mouse strain carrying a CRTC1-MAML2 knock-in allele under the <i>Crtc1</i> natural regulatory control (mimicking the t(11;19) genetic abnormality in human MEC) died after birth.....           | 2  |
| <b>Figure S2:</b> The transgene construct, genotyping, and transgene copy numbers in three Cre-regulated CRTC1-MAML2 transgenic mouse lines were shown.....                                                         | 3  |
| <b>Figure S3:</b> Western blotting analysis of the CRTC1-MAML2 fusion transgene expression in salivary gland tumors developed from Line 1 and Line 2 mCre-CM (+) mice.....                                          | 4  |
| <b>Figure S4:</b> Western blot analysis of the CRTC1-MAML2 transgene expression in various tissues of the mCre;CM(+) mouse line.....                                                                                | 5  |
| <b>Figure S5:</b> The mCre-CM1(+) mice developed ear cysts with CRTC1-MAML2 fusion expression .....                                                                                                                 | 6  |
| <b>Figure S6:</b> The Cre-regulated CRTC1-MAML2 transgenic line, after being crossed with Dcpp1-Cre-ERT2 or Pip-Cre-ERT2 transgenic mice, expressed low levels of the CRTC1-MAML2 fusion in salivary glands.....    | 7  |
| <b>Figure S7:</b> Salivary gland tumors developed from the Line 2 mCre-CM(+) mice displayed a characteristic histological feature of human MEC and expressed the CRTC1-MAML2 fusion. ....                           | 8  |
| <b>Figure S8:</b> Representative images showed abnormal ducts in the salivary glands of mCre-CM(+) mice...9                                                                                                         |    |
| <b>Figure S9:</b> Expression levels of the CRTC1-MAML2 fusion and its known target genes in the CRTC1-MAML2 fusion-induced murine MEC tumors were analyzed by qRT-PCR .....                                         | 10 |
| <b>Figure S10:</b> Enhanced expression of the top 10 genes shared by both the RB1/RBL1 loss-induced and CDK4/6-RB integrated signatures in mouse MEC tumors were validated by qRT-PCR.....                          | 11 |
| <b>Figure S11:</b> Immunohistochemical analysis of mouse MEC tumors for p-Rb, P16 and Cdk4.....                                                                                                                     | 12 |
| <b>Figure S12:</b> Western blotting analysis of phosphorylated RB (p-RB) and total RB levels in human MEC H3118 cells with shRNA-mediated CRTC1-MAML2/MAML2 knockdown and with MAML2 specific Crispr-knockout. .... | 13 |
| <b>Figure S13:</b> Combination index (CI) values of Palbociclib and Erlotinib treatment in human MEC colony assays were determined using CalcuSyn software.....                                                     | 14 |

### Supplemental Tables (S1-S4)

|                                                                                                                                                                                                   |    |
|---------------------------------------------------------------------------------------------------------------------------------------------------------------------------------------------------|----|
| <b>Table S1:</b> A list of genes show up-regulated expression in CRTC1-MAML2-induced murine MEC and down-regulated expression in CRTC1-MAML2-depleted human MEC cells or the reverse pattern..... | 15 |
| <b>Table S2:</b> The top 15 enriched oncogenic signatures in the CRTC1-MAML2-induced murine MEC vs. normal salivary gland tissues are shown.....                                                  | 19 |
| <b>Table S3:</b> A list of differentially expressed genes in the CRTC1-MAML2-induced murine MEC show overlaps with the CDK4/6-RB signature and/or the RB1/RBL1 loss-induced gene set.....         | 20 |
| <b>Table S4:</b> Primer sequences used for the qRT-PCR analysis in this study.....                                                                                                                | 24 |

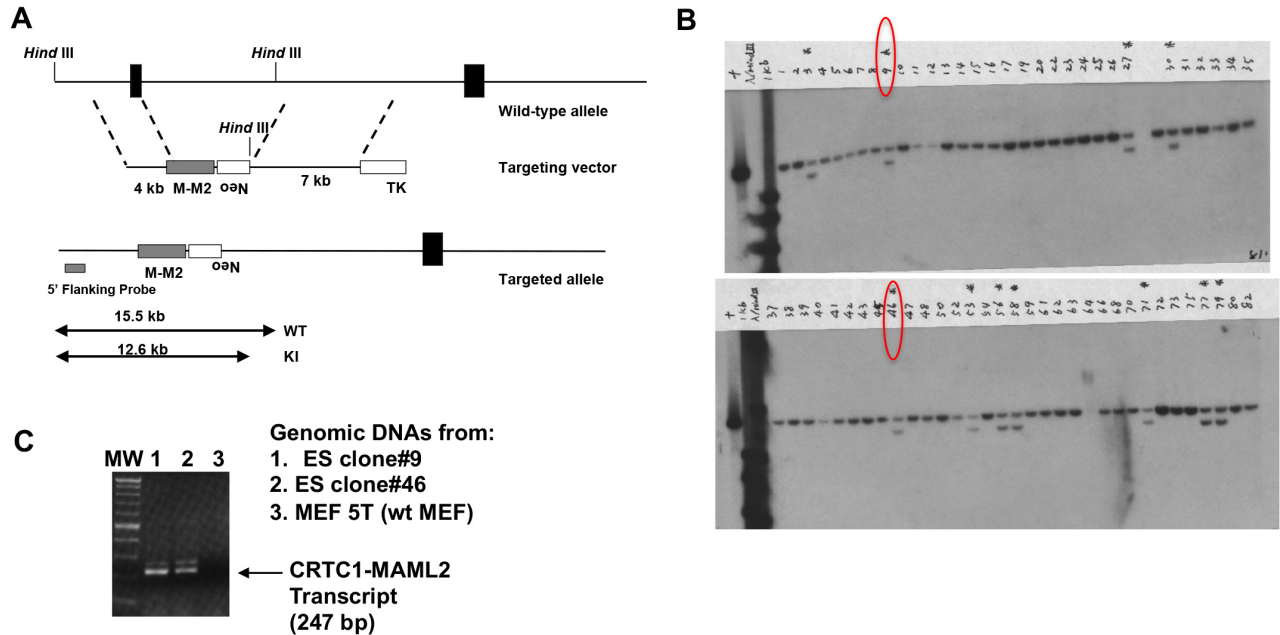

**Figure S1: A mouse strain carrying a CRTC1-MAML2 knock-in allele under the *Crtc1* natural regulatory control (mimicking the t(11;19) genetic abnormality in human MEC) died after birth. (A)** The CRTC1-MAML2 (M-M2) knock-in construct contained a 4 kb homologous arm (5' *Crtc1* upstream regulatory sequence) plus the CRTC1-MAML2 fusion open reading frame sequence, and a 7 kb 3' homologous arm that flanked the neo cassette in the pKOP906NeoTK-anti vector. **(B)** This construct was linearized with *Not*I and electroporated into Bruce 4 ES cells (derived from the C57BL/6 strain). The transfectant ES cells were selected in the presence of G418 and ganciclovir, and then expanded for Southern analysis. Specifically, the genomic DNA was isolated and digested with *Hind* III, and probed with a 5' flanking probe as shown in (A). The knock-in (KI) allele (giving rise to a 12.6 kb *Hind* III-digested fragment) was distinguished from the wildtype (WT) allele (producing a 15.5 kb fragment) by size. **(C)** Two ES clones (#9 and #46) were analyzed for the CRTC1-MAML2 transcripts by RT-PCR. The primer sequences were 5' CGGAAATTCAGCGAGAAGAT 3' (upper) and 5' GAGATTCTCCCAACACGAA 3' (lower), which amplified a 247 bp fusion product. These two ES clones (#9, and #46) were thus validated for successful homologous recombination. They were subsequently used for the injections into Balb/C blastocysts, which were then transferred to recipient mothers (Swiss Webster mice) to generate chimeras as indicated by the presence of black coat color. A total of 13 Bl6/Balb/c chimera, 8 males & 5 females were obtained. Three of the mature chimeric males with the high percentage of black fur were then crossed with Balb/c females in order to produce germline founders. The pups that were positive for the fusion knock-in allele died immediately after birth.

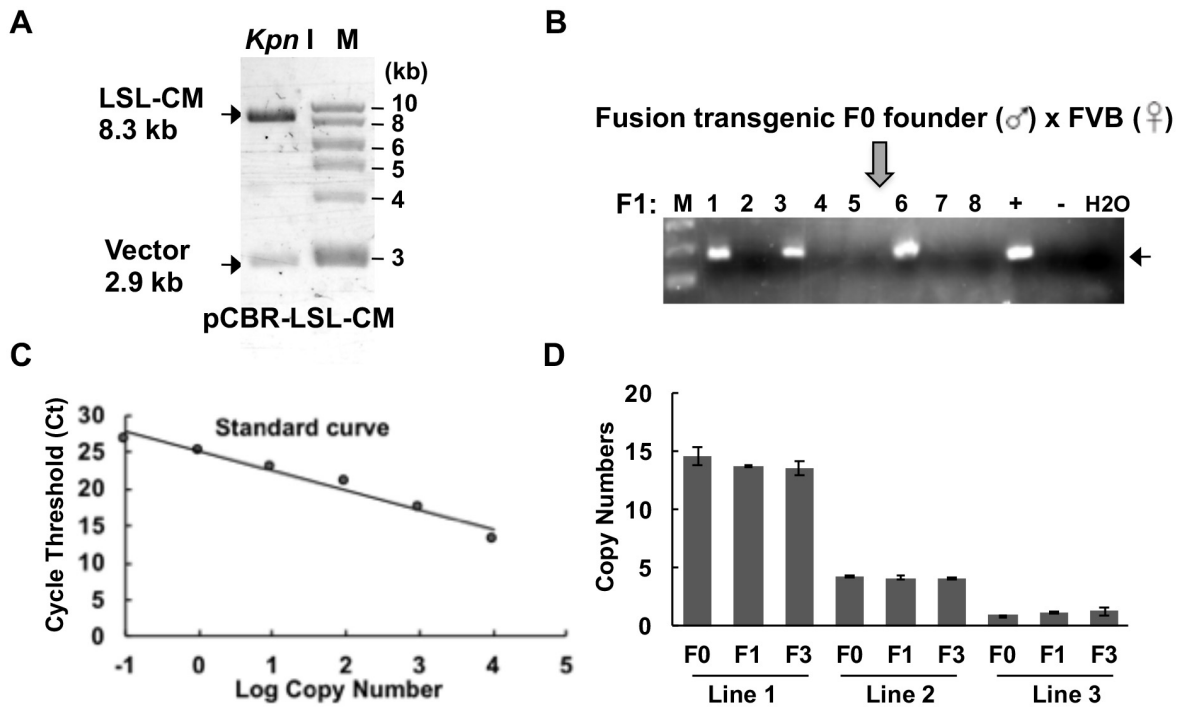

**Figure S2: The transgene construct, genotyping, and transgene copy numbers in three Cre-regulated CRTG1-MAML2 transgenic mouse lines were shown. (A)** The fusion transgene fragment LSL-CM (8.3kb) was isolated after the vector sequence (2.9 kb) was removed from the pCBR-LSL-CM construct with *Kpn*I digestion. The purified fusion transgenic fragments were used for microinjection into the pronuclei of FVB/J fertilized eggs to generate transgenic mice. **(B)** The F0 founder mice were bred to FVB mice and the transgene was detected in F1 offspring mice. PCR analysis of tail DNA of one litter of F1 offspring was shown. The pCBR-LSL-CM transgene construct were used as a positive control, and tail DNA from a FVB mouse and water were used as negative controls. **(C)** A standard curve was established to correlate cycle threshold (Ct value) with the transgene gene copy number of purified fusion transgene plasmids by qPCR. **(D)** The qPCR analysis of tail DNAs was performed to determine the transgene copy numbers for three transgenic lines based on the standard curve (C). Three transgenic lines maintained similar transgene copy numbers over three generations in comparison to their founder mice, indicating that the transgene is stably integrated into the mouse genome.

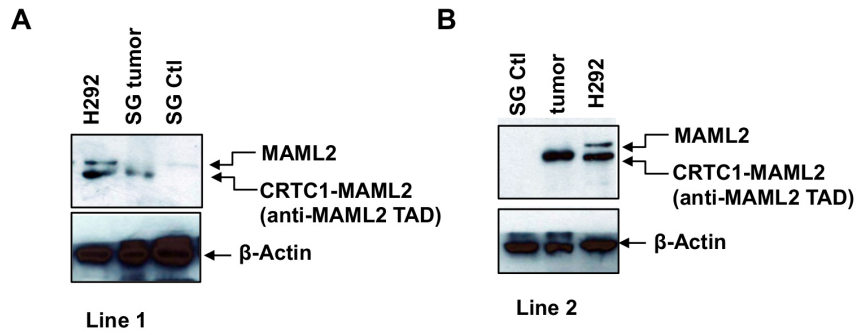

**Figure S3: Western blotting analysis of the CRTC1-MAML2 fusion transgene expression in salivary gland tumors developed from Line 1 and Line 2 mCre-CM (+) mice. (A)** Expression levels of the CRTC1-MAML2 transgenic gene in the salivary gland tumor developed from a Line 1 mCre-CM(+) mouse was analyzed. Salivary gland tissue from a transgene-negative mCre-CM(-) littermate was used as a negative control (SG Ctl) and human MEC H292 cells were used as positive control. Mouse  $\beta$ -Actin was blotted as a loading control. **(B)** A similar analysis was conducted on the salivary gland tumors developed from a Line 2 mCre-CM(+) mouse.

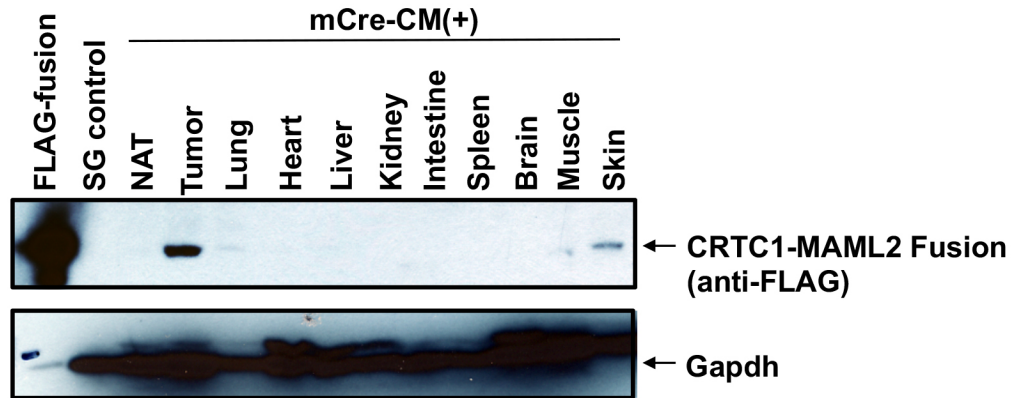

**Figure S4: Western blot analysis of the CRTC1-MAML2 transgene expression in various tissues of the mCre;CM(+) mouse line.** Western blot analysis was performed to determine the CRTC1-MAML2 transgene expression in a salivary gland tumor (T) and its adjacent normal tissue (NAT) and various tissues collected from a mCre-CM1(+) mouse (Line 1). The salivary gland tissue from an age-matched transgene-negative mCre-CM(-) mouse was used as a negative control (SG Control). Protein lysates prepared from 293T cells expressing FLAG-tagged CRTC1-MAML2 fusion were used as a positive control (FLAG-fusion). The transgenic FLAG-tagged CRTC1-MAML2 fusion protein was detected by anti-FLAG antibodies. Mouse Gapdh was blotted as a loading control.

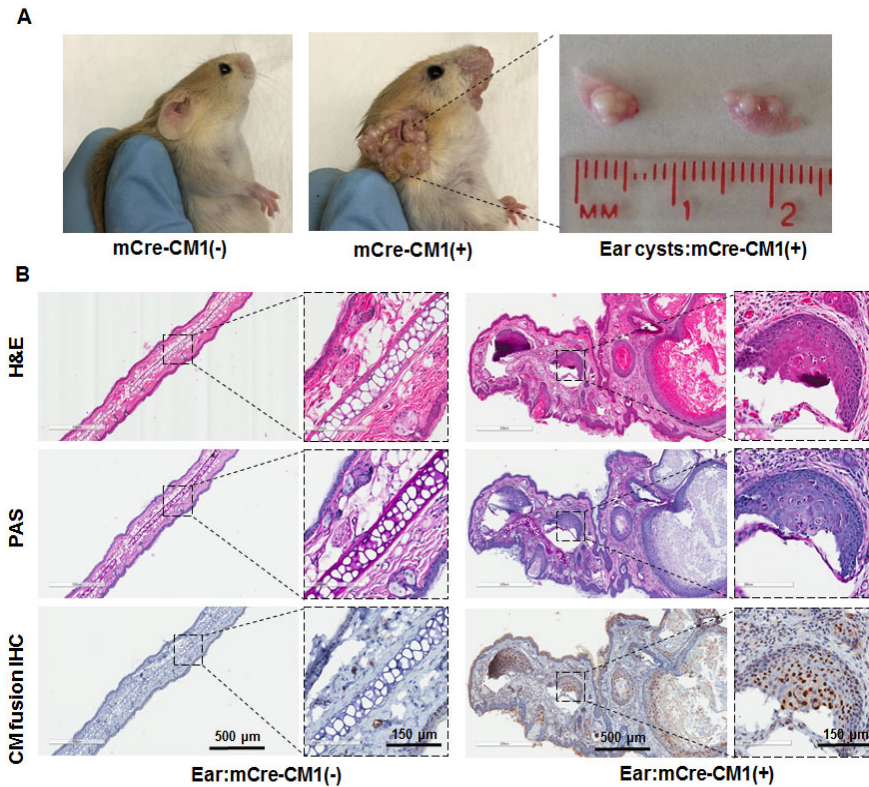

**Figure S5: The mCre-CM1(+) mice developed ear cysts with CRTC1-MAML2 fusion expression. (A)** Representative images show a mCre-CM (+) mouse (Line 1) with ear cysts and a transgene-negative mCre-CM(-) mouse control. **(B)** The ear tissues of mCre-CM (-) and mCre-CM (+) mice were stained with H&E for histological analysis, PAS to detect mucin-expressing cells, and IHC with MAML2 TAD antibodies to detect the transgenic CRTC1-MAML2 fusion expression. Scale bar: 500  $\mu$ m (left panels), 150  $\mu$ m (right panels)

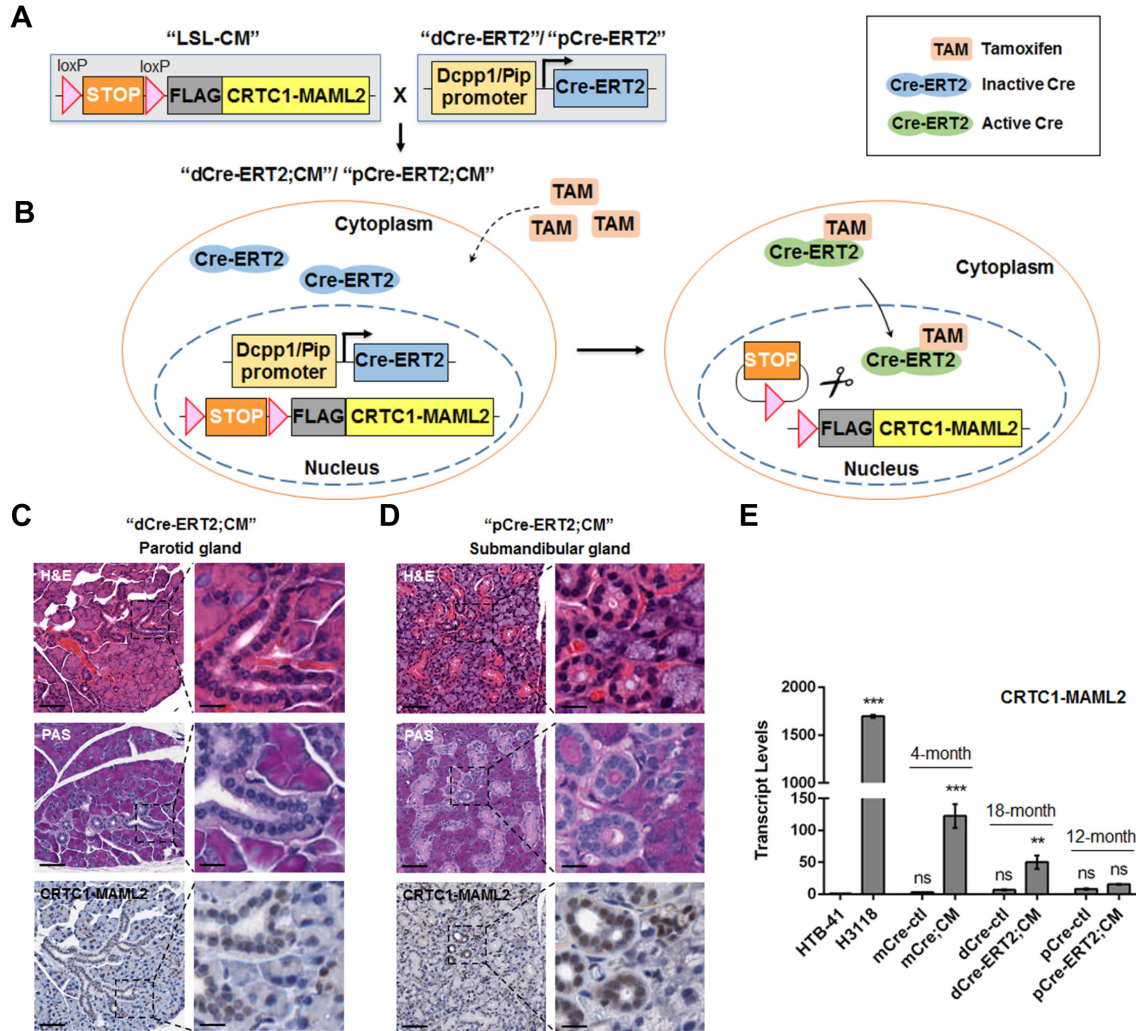

**Figure S6: The Cre-regulated CRTC1-MAML2 transgenic line, after being crossed with Dcpp1-Cre-ERT2 or Pip-Cre-ERT2 transgenic mice, expressed low levels of the CRTC1-MAML2 fusion in salivary glands.** (A) Breeding strategies for obtaining “dCre-ERT2; CM” and “pCre-ERT2; CM” mice were shown. (B) A schematic diagram showed that tamoxifen (TAM)-induced Cre recombination leads to the expression of the CRTC1-MAML2 fusion transgene. (C) The “dCre-ERT2; CM” mice were injected with TAM at about 4 weeks old for 3 consecutive days. The images of HE staining, PAS staining and the CRTC1-MAML2 IHC of parotid glands of a representative “dCre-ERT2; CM” mouse (male, 18-month old) were shown. (D) The “pCre-ERT2; CM” mice were injected with TAM at about 4 weeks old for 3 consecutive days. The images of HE staining, PAS staining and the CRTC1-MAML2 IHC of submandibular glands of a representative “pCre-ERT2; CM” mouse (female, 12-month old) were shown. Scale bar: 100  $\mu$ m (left panels), 25  $\mu$ m (right panels). (E) The transcript levels of the CRTC1-MAML2 fusion transgene in salivary glands of “mCre; CM”, “dCre-ERT2; CM” and “pCre-ERT2; CM” mice were determined by qRT-PCR. HTB-41 and H3118 were used as negative and positive controls for the CRTC1-MAML2 fusion, respectively. “mCre-ctl”, “dCre-ctl” and “pCre-ctl” were age-matched controls containing Cre but without the CRTC1-MAML2 fusion transgene. One-way ANOVA was used for multiple comparisons (\*\* $p < 0.01$ , \*\*\*  $p < 0.001$ ).

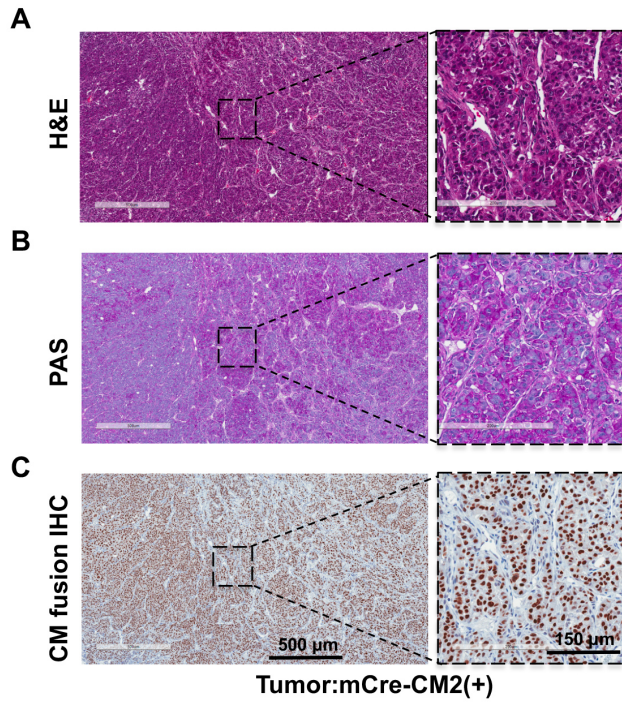

**Figure S7: Salivary gland tumors developed from the Line 2 mCre-CM(+) mice displayed some histological features of human MEC and expressed the CRTC1-MAML2 fusion.** Salivary gland tumor developed from a mCre-CM(+) mouse (generated from the mating of Cre-regulated CRTC1-MAML2 mouse line 2 with the mCre line) was subjected to H&E staining (**A**); PAS staining for detecting mucin-expressing cells (**B**); and IHC staining with anti-MAML2 TAD antibodies for detecting the transgenic CRTC1-MAML2 fusion expression (**C**). Scale bar: 500  $\mu\text{m}$  (left panels), 150  $\mu\text{m}$  (right panels).



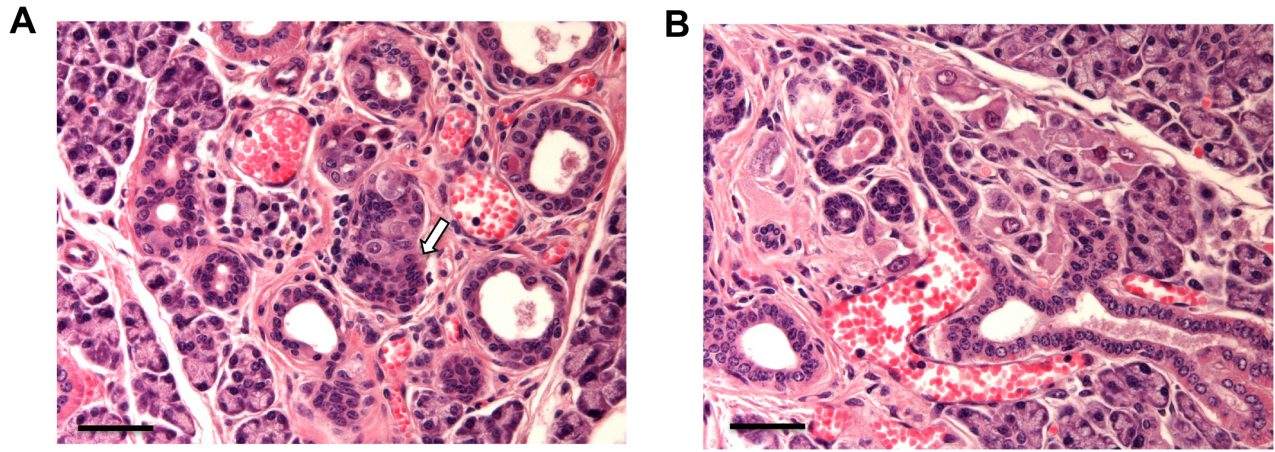

**Figure S8: Representative images showed abnormal ducts in the salivary glands of mCre-CM(+) mice (without palpable tumors).** Sections of submandibular glands from two mCre-CM(+) mice of around 10 weeks old were stained by H&E (A, B). Abnormal cells within a duct were marked by a white arrow (A). Scale bars: 50  $\mu$ m.

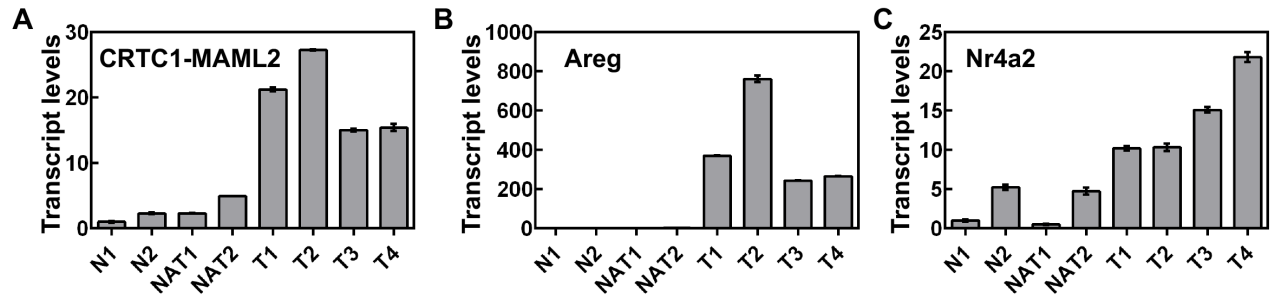

**Figure S9: Expression levels of the CRTC1-MAML2 fusion and its known target genes in the CRTC1-MAML2 fusion-induced murine MEC tumors were analyzed by qRT-PCR.** The CRTC1-MAML2 fusion-induced salivary gland tumors (T1, T2), their matched tumor adjacent normal tissues (NAT1, NAT2), normal salivary gland tissues from the control non-transgene carrier littermates (N1, N2), and also 2 salivary gland tumors from separate mice (T3, T4) were used in this analysis. **(A)** The CRTC1-MAML2 fusion transgene was highly expressed in tumors but low or undetectable expressed in tumor adjacent normal tissues and normal salivary gland tissues. **(B, C)** The CRTC1-MAML2 target genes Areg (B) and Nr4a2 (C) were significantly upregulated in tumors. The CRTC1-MAML2, Areg and Nr4a2 mRNA expressions were normalized to the levels of reference gene Gapdh.

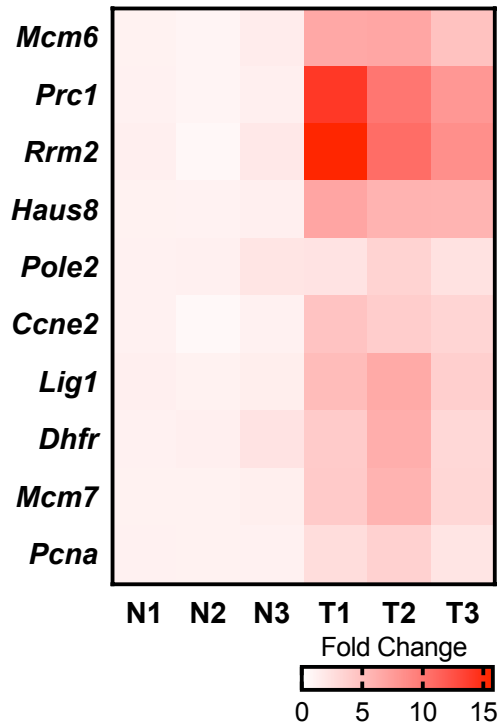

**Figure S10: Enhanced expression of the top 10 genes shared by both the RB1/RBL1 loss-induced and CDK4/6-RB integrated signatures in mouse MEC tumors were validated by qRT-PCR.** RNAs isolated from 3 salivary gland tumors from the mCre-CM mice and 3 normal salivary gland tissues from the control littermates were used for qRT-PCR analysis, and the expression was normalized using the control *Hprt* gene. The relative expression data were represented as a heatmap using Prism GraphPad 8.

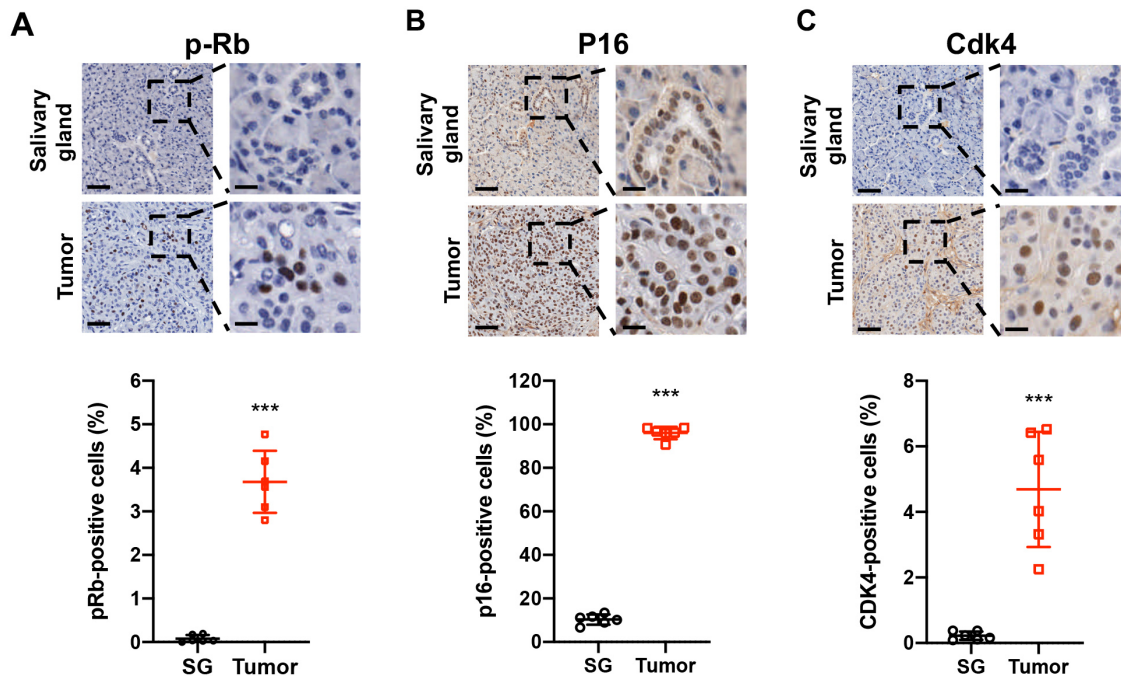

**Figure S11: Immunohistochemical analysis of mouse MEC tumors for p-Rb, P16 and Cdk4.** Paraffin-embedded mouse MEC tumors and normal salivary gland tissues from the non-transgene carrier control mice were subjected to IHC staining using phospho-Rb (Ser807/811) (Cell signaling # 8516), p16 (Santa Cruz # sc-1661), and Cdk4 (Santa Cruz # sc-166373). Representatives of IHC staining for **(A)** p-Rb, **(B)** p16 and **(C)** Cdk4 were shown (left bar = 100  $\mu$ m, right bar = 25  $\mu$ m). The positively-stained cells were quantified in 6 randomly selected visual fields (5x, 1000x1000 pixels) using ImageJ. The result was presented as percentage of positively-stained cells per visual field. Two-tailed t-test was used to calculate the p values (\*\*\*) ( $p < 0.001$ ).

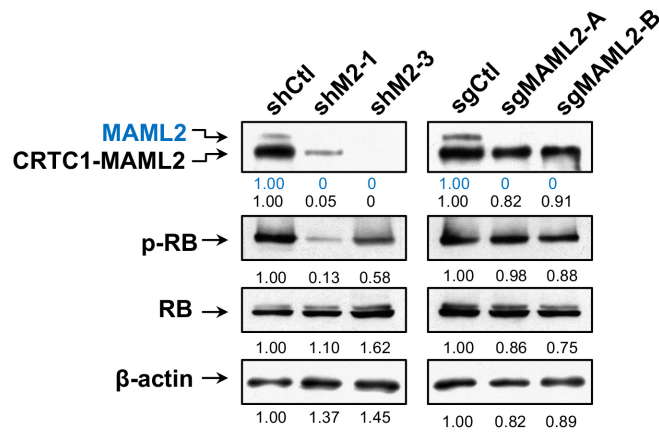

**Figure S12: Western blotting analysis of phosphorylated RB (p-RB) and total RB levels in human MEC H3118 cells with shRNA-mediated CRTC1-MAML2/MAML2 knockdown and with CRISPR/Cas9-mediated MAML2 knockout.** Human MEC H3118 cells were transduced with lentiviruses expressing shRNAs (shM2-1, 5'-CCCTGTCTAAACTCCAGGATA-3'; shM2-3, 5'-CCCAAAGCAATTGTTAGCAAA-3') that target the respective 3' UTR and TAD domain of the CRTC1-MAML2 fusion and MAML2, or scramble shRNA control (Ctl). Cell lysates were prepared at 96 hours after viral infection for Western blotting (left panel). Stable Cas9-expressing H3118 cells were transduced with lentiviruses expressing sgRNAs that target the exon 1 of MAML2 (sgMAML2-A, 5'-TGTGAAGGACGATATGAACG-3'; sgMAML2-B, 5'-GATAGCACTGTGCACTCTCG-3') or control (sgCtl), and cell lysates were prepared at 96 hours after viral infection for Western blotting (right panel). Western blotting was performed using antibodies against phospho-RB (Ser807/811) (CST #8516) and RB (CST554136), and  $\beta$ -actin (Sigma #5136). The phospho-RB (Ser807/811) level was reduced in CRTC1-MAML2/MAML2 knockdown but relatively unchanged in CRISPR/Cas9-mediated MAML2 knockout H3118 cells, whereas the total RB level remained at similar levels, indicating that the depletion of fusion reduced phosphorylated RB level.  $\beta$ -ACTIN was used as a loading control.

| Cell line | ED50    | ED75    | ED90    |
|-----------|---------|---------|---------|
| H3118     | 0.164   | 0.184   | 0.206   |
| HMC-3B    | < 0.001 | < 0.001 | < 0.001 |
| H292      | 0.790   | 0.184   | 0.087   |

◆ Strong synergism (CI<0.3)

◆ Moderate synergism (CI=0.3-0.85)

**Figure S13: Combination index (CI) values of palbociclib and erlotinib treatment in human MEC colony assays were determined using CalcuSyn software. CI<1, CI=1, and CI>1 indicate synergism, additivity and antagonism, respectively.**

**Table S1: A list of genes show up-regulated expression in CRT1-MAML2-induced murine MEC and down-regulated expression in CRT1-MAML2-depleted human MEC cells or the reverse pattern.** \*Differential expressed genes (DEGs) in mouse MEC vs normal salivary gland tissues were defined using cut-off criteria of absolute fold change of  $\geq 2.0$  and FDR p value of  $\leq 0.05$ . These genes were compared with the reported DEGs in fusion-depleted human MEC H3118 cells vs control cells (Chen et al., BMC Cancer 2015). Red: upregulated; blue: down-regulated.

| ProbeName     | Gene Name        | Gene description                                              | Fold Change<br>(Tumor/Normal) | FDR p-value | probeID     | Gene<br>Symbol | Fold change<br>(fusion-depleted<br>vs control H3118) | p-value  |
|---------------|------------------|---------------------------------------------------------------|-------------------------------|-------------|-------------|----------------|------------------------------------------------------|----------|
| ASMM10P010373 | <b>Pcsk1</b>     | proprotein convertase subtilisin/kexin type 1                 | 1976.87                       | 4.77E-05    | 205825_at   | PCSK1          | -5.7                                                 | 0.00048  |
| ASMM10P022539 | <b>Ptgs2</b>     | prostaglandin-endoperoxide synthase 2                         | 575.31                        | 4.14E-05    | 1554997_a_a | PTGS2          | -2.41                                                | 0.02817  |
| ASMM10P031996 | <b>Areg</b>      | amphiregulin                                                  | 512.99                        | 5.58E-05    | 205239_at   | AREG           | -2.23                                                | 0.04495  |
| ASMM10P012140 | <b>Stc1</b>      | stanniocalcin 1                                               | 344.87                        | 4.77E-05    | 204597_x_at | STC1           | -21.74                                               | 0        |
| ASMM10P005076 | <b>Smoc1</b>     | SPARC related modular calcium binding 1                       | 287.14                        | 0.0001065   | 222783_s_at | SMOC1          | -6.47                                                | 0        |
| ASMM10P034033 | <b>Pthlh</b>     | parathyroid hormone-like peptide                              | 207.66                        | 0.0001281   | 206300_s_at | PTH1H          | -3.82                                                | 0.00035  |
| ASMM10P036818 | <b>Calca</b>     | calcitonin/calcitonin-related polypeptide, alpha              | 175.81                        | 4.14E-05    | 217561_at   | CALCA          | -3.49                                                | 0.00643  |
| ASMM10P027766 | <b>Mfsd2a</b>    | major facilitator superfamily domain containing 2A            | 127.35                        | 8.16E-05    | 225316_at   | MFSD2A         | -4.96                                                | 5.00E-05 |
| ASMM10P021239 | <b>Ano3</b>      | anoctamin 3                                                   | 85.62                         | 0.0004157   | 215241_at   | ANO3           | -2.5                                                 | 0.00317  |
| ASMM10P028730 | <b>Car9</b>      | carbonic anhydrase 9                                          | 78.25                         | 0.0002255   | 205199_at   | CA9            | -2.77                                                | 0.00402  |
| ASMM10P021291 | <b>Grem1</b>     | gremlin 1                                                     | 57.19                         | 0.0002212   | 218469_at   | GREM1          | -5.21                                                | 0.00105  |
| ASMM10P005824 | <b>Smox</b>      | spermine oxidase                                              | 56.33                         | 0.0001664   | 210357_s_at | SMOX           | -2.95                                                | 0.01324  |
| ASMM10P041830 | <b>C2cd4a</b>    | C2 calcium-dependent domain containing 4A                     | 51.50                         | 0.0011874   | 241031_at   | C2CD4A         | -7.84                                                | 0.00011  |
| ASMM10P051974 | <b>Ube2ql1</b>   | ubiquitin-conjugating enzyme E2Q family-like 1                | 46.96                         | 0.0029308   | 226612_at   | UBE2QL1        | -6.81                                                | 0        |
| ASMM10P040244 | <b>Sfrp1</b>     | secreted frizzled-related protein 1                           | 35.46                         | 0.0007672   | 202037_s_at | SFRP1          | -3.12                                                | 0.00018  |
| ASMM10P044579 | <b>Il13ra2</b>   | interleukin 13 receptor, alpha 2                              | 33.74                         | 0.0013247   | 206172_at   | IL13RA2        | -2.55                                                | 0.01144  |
| ASMM10P006754 | <b>Nid2</b>      | nidogen 2                                                     | 29.81                         | 0.0002013   | 204114_at   | NID2           | -2.49                                                | 0.00011  |
| ASMM10P020398 | <b>Ptges</b>     | prostaglandin E synthase                                      | 28.56                         | 7.37E-05    | 210367_s_at | PTGES          | -2.81                                                | 0.0132   |
| ASMM10P048901 | <b>Cd55</b>      | CD55 antigen                                                  | 25.09                         | 0.0023295   | 201925_s_at | CD55           | -2.37                                                | 1.00E-04 |
| ASMM10P011052 | <b>Grem2</b>     | gremlin 2 homolog, cysteine knot superfamily (Xenopus laevis) | 23.01                         | 0.0012192   | 240509_s_at | GREM2          | -3.95                                                | 0.00271  |
| ASMM10P040321 | <b>Dusp4</b>     | dual specificity phosphatase 4                                | 22.24                         | 0.0005955   | 204015_s_at | DUSP4          | -3.93                                                | 0.00155  |
| ASMM10P007618 | <b>Tnfrsf10b</b> | tumor necrosis factor receptor superfamily, member 10b        | 21.97                         | 8.82E-05    | 210405_x_at | TNFRSF10B      | -2.89                                                | 0.00018  |
| ASMM10P032138 | <b>Ephx4</b>     | epoxide hydrolase 4                                           | 21.72                         | 0.0133852   | 239579_at   | EPHX4          | -2.15                                                | 0.00106  |
| ASMM10P010572 | <b>Pde4d</b>     | phosphodiesterase 4D, cAMP specific                           | 19.74                         | 0.0001943   | 228962_at   | PDE4D          | -2.93                                                | 0.00034  |
| ASMM10P009666 | <b>Raet1e</b>    | retinoic acid early transcript 1E                             | 18.48                         | 0.0005421   | 1552777_a_a | RAET1E         | -2.72                                                | 0.02536  |
| ASMM10P051632 | <b>Pxdc1</b>     | PX domain containing 1                                        | 17.38                         | 0.004974    | 231387_at   | PXDC1          | -2.16                                                | 0.00584  |
| ASMM10P019230 | <b>Avpi1</b>     | arginine vasopressin-induced 1                                | 16.73                         | 0.000244    | 218631_at   | AVPI1          | -2.47                                                | 0.00015  |
| ASMM10P015787 | <b>Dusp1</b>     | dual specificity phosphatase 1                                | 16.33                         | 0.002046    | 201041_s_at | DUSP1          | -4.81                                                | 0.00017  |
| ASMM10P029713 | <b>Fuca1</b>     | fucosidase, alpha-L-1, tissue                                 | 16.12                         | 0.0014108   | 202838_at   | FUCA1          | -3.09                                                | 0.0048   |
| ASMM10P032468 | <b>Bri3bp</b>    | Bri3 binding protein                                          | 16.05                         | 0.0018799   | 231810_at   | BRI3BP         | -2.15                                                | 0.0253   |
| ASMM10P025736 | <b>Usp13</b>     | ubiquitin specific peptidase 13 (isopeptidase T-3)            | 16.00                         | 0.0017911   | 205356_at   | USP13          | -2.8                                                 | 0.00813  |
| ASMM10P042737 | <b>Mcam</b>      | melanoma cell adhesion molecule                               | 11.26                         | 0.000627    | 1568191_at  | MCAM           | -3.45                                                | 7.00E-05 |
| ASMM10P011237 | <b>Ptp4a1</b>    | protein tyrosine phosphatase 4a1                              | 10.23                         | 0.0017695   | 200730_s_at | PTP4A1         | -2.12                                                | 0.00068  |
| ASMM10P008715 | <b>Dst</b>       | dystonin                                                      | 10.06                         | 0.0014659   | 232098_at   | DST            | -2.11                                                | 0.03694  |
| ASMM10P050921 | <b>Snapc1</b>    | small nuclear RNA activating complex, polypeptide 1           | 9.37                          | 0.0001815   | 205443_at   | SNAPC1         | -2.01                                                | 0.00323  |
| ASMM10P015058 | <b>Bdh1</b>      | 3-hydroxybutyrate dehydrogenase, type 1                       | 9.09                          | 0.0042887   | 211715_s_at | BDH1           | -2.25                                                | 0.00152  |
| ASMM10P018767 | <b>Aldh3b1</b>   | aldehyde dehydrogenase 3 family, member B1                    | 8.87                          | 0.0012238   | 205640_at   | ALDH3B1        | -2.48                                                | 9.00E-05 |
| ASMM10P006778 | <b>Pecam1</b>    | platelet/endothelial cell adhesion molecule 1                 | 8.73                          | 0.0406114   | 208982_at   | PECAM1         | -6.92                                                | 0        |
| ASMM10P055057 | <b>Fkbp7</b>     | FK506 binding protein 7                                       | 8.36                          | 0.0004403   | 224002_s_at | FKBP7          | -2.13                                                | 0.00893  |
| ASMM10P050653 | <b>Odc1</b>      | ornithine decarboxylase, structural 1                         | 8.32                          | 0.0007386   | 200790_at   | ODC1           | -2.54                                                | 0.0019   |

|               |                    |                                                                     |      |           |             |          |       |          |
|---------------|--------------------|---------------------------------------------------------------------|------|-----------|-------------|----------|-------|----------|
| ASMM10P055024 | <b>Kynu</b>        | kynureninase (L-kynurenine hydrolase)                               | 8.32 | 0.0197558 | 210663_s_at | KYNU     | -2.63 | 0.00098  |
| ASMM10P022765 | <b>Arpc5l</b>      | actin related protein 2/3 complex, subunit 5-like                   | 8.05 | 0.0076867 | 226914_at   | ARPC5L   | -2.23 | 0.00244  |
| ASMM10P018786 | <b>Syt12</b>       | synaptotagmin XII                                                   | 7.89 | 0.0008355 | 228072_at   | SYT12    | -2.97 | 0.00015  |
| ASMM10P000286 | <b>Mprip</b>       | myosin phosphatase Rho interacting protein                          | 7.45 | 0.0019086 | 214694_at   | MPRIP    | -2.54 | 0.00113  |
| ASMM10P018788 | <b>2010003K11</b>  | RIKEN cDNA 2010003K11 gene                                          | 7.33 | 0.0013587 | 233938_at   | C11orf86 | -2.31 | 0.00125  |
| ASMM10P039328 | <b>Snx25</b>       | sorting nexin 25                                                    | 7.30 | 0.000166  | 232425_at   | SNX25    | -2.36 | 0.01993  |
| ASMM10P045191 | <b>Hal</b>         | histidine ammonia lyase                                             | 6.40 | 0.013382  | 206643_at   | HAL      | -6.79 | 2.00E-05 |
| ASMM10P031434 | <b>Steap4</b>      | STEAP family member 4                                               | 6.14 | 0.0207594 | 225987_at   | STEAP4   | -3.03 | 0.00022  |
| ASMM10P045625 | <b>Lum</b>         | lumican                                                             | 6.14 | 0.0027542 | 201744_s_at | LUM      | -6.98 | 0.00061  |
| ASMM10P039750 | <b>Cdh11</b>       | cadherin 11                                                         | 5.62 | 0.0015414 | 207173_x_at | CDH11    | -3.38 | 0.00044  |
| ASMM10P029844 | <b>Casp9</b>       | caspase 9                                                           | 5.51 | 0.0005406 | 210775_x_at | CASP9    | -2.33 | 0.00016  |
| ASMM10P016441 | <b>Xdh</b>         | xanthine dehydrogenase                                              | 5.50 | 0.0016017 | 210301_at   | XDH      | -2.87 | 0.02018  |
| ASMM10P052596 | <b>Serpinh9</b>    | serine (or cysteine) peptidase inhibitor, clade B, member 9         | 5.32 | 0.0379964 | 242814_at   | SERPINH9 | -2.98 | 0.00472  |
| ASMM10P048403 | <b>Havcr2</b>      | hepatitis A virus cellular receptor 2                               | 5.29 | 0.0003409 | 235458_at   | HAVCR2   | -3.16 | 5.00E-05 |
| ASMM10P031029 | <b>Fam216a</b>     | family with sequence similarity 216, member A                       | 5.11 | 0.0009493 | 204521_at   | FAM216A  | -2.16 | 0.00016  |
| ASMM10P042038 | <b>Zbtb38</b>      | zinc finger and BTB domain containing 38                            | 5.09 | 0.0086691 | 219221_at   | ZBTB38   | -2.19 | 0.04405  |
| ASMM10P015055 | <b>Fam43a</b>      | family with sequence similarity 43, member A                        | 5.01 | 0.0053646 | 227410_at   | FAM43A   | -2.47 | 0.00646  |
| ASMM10P039881 | <b>Tmem231</b>     | transmembrane protein 231                                           | 4.77 | 0.0011815 | 64900_at    | TMEM231  | -2.03 | 0.02144  |
| ASMM10P019387 | <b>Gfra1</b>       | glial cell line derived neurotrophic factor family receptor alpha : | 4.71 | 0.0018261 | 227550_at   | GFRA1    | -4.56 | 0.00966  |
| ASMM10P030279 | <b>Srgn</b>        | serglycin                                                           | 4.62 | 0.0217835 | 201859_at   | SRGN     | -3.95 | 0.00518  |
| ASMM10P055466 | <b>Sh3gl2</b>      | SH3-domain GRB2-like 2                                              | 4.44 | 0.0150867 | 205751_at   | SH3GL2   | -2.15 | 0.00032  |
| ASMM10P022699 | <b>Ptgs1</b>       | prostaglandin-endoperoxide synthase 1                               | 4.42 | 0.0054977 | 205128_x_at | PTGS1    | -3.89 | 0        |
| ASMM10P050949 | <b>Arg2</b>        | arginase type II                                                    | 4.40 | 0.0206531 | 203946_s_at | ARG2     | -7.79 | 5.00E-05 |
| ASMM10P042080 | <b>Slc35g2</b>     | solute carrier family 35, member G2                                 | 4.40 | 0.0231678 | 219569_s_at | SLC35G2  | -2.57 | 0.00077  |
| ASMM10P054381 | <b>Ednrb</b>       | endothelin receptor type B                                          | 4.26 | 0.0069715 | 204271_s_at | EDNRB    | -2.23 | 0.00037  |
| ASMM10P009532 | <b>Sik2</b>        | salt inducible kinase 2                                             | 3.95 | 0.0035941 | 223430_at   | SIK2     | -4.06 | 0        |
| ASMM10P008574 | <b>Il6</b>         | interleukin 6                                                       | 3.95 | 0.0435905 | 205207_at   | IL6      | -3.35 | 0.00259  |
| ASMM10P042706 | <b>Clmp</b>        | CXADR-like membrane protein                                         | 3.56 | 0.001889  | 228082_at   | CLMP     | -2.63 | 7.00E-05 |
| ASMM10P051910 | <b>Zfp367</b>      | zinc finger protein 367                                             | 3.45 | 0.0050865 | 229551_x_at | ZNF367   | -2.31 | 0.00111  |
| ASMM10P050919 | <b>Prkch</b>       | protein kinase C, eta                                               | 3.40 | 0.0304536 | 218764_at   | PRKCH    | -2.16 | 0.00061  |
| ASMM10P007977 | <b>Ergic1</b>      | endoplasmic reticulum-golgi intermediate compartment (ERGIC         | 3.39 | 0.0057481 | 223847_s_at | ERGIC1   | -2.01 | 0.00621  |
| ASMM10P016623 | <b>Pde10a</b>      | phosphodiesterase 10A                                               | 3.35 | 0.009019  | 205501_at   | PDE10A   | -3.32 | 1.00E-04 |
| ASMM10P011302 | <b>Fndc3a</b>      | fibronectin type III domain containing 3A                           | 3.28 | 0.0288606 | 238961_s_at | FNDC3A   | -2.09 | 0.04589  |
| ASMM10P027567 | <b>Aig1</b>        | androgen-induced 1                                                  | 3.07 | 0.0229018 | 230520_at   | AIG1     | -3.42 | 1.00E-05 |
| ASMM10P053678 | <b>Zc3h12b</b>     | zinc finger CCCH-type containing 12B                                | 2.92 | 0.0107874 | 229234_at   | ZC3H12B  | -2.23 | 0.00143  |
| ASMM10P009234 | <b>Tango6</b>      | transport and golgi organization 6                                  | 2.90 | 0.0054289 | 226467_at   | TMCO7    | -3.54 | 7.00E-05 |
| ASMM10P006004 | <b>C1qtnf6</b>     | C1q and tumor necrosis factor related protein 6                     | 2.88 | 0.0024489 | 223571_at   | C1QTNF6  | -2.81 | 0.00023  |
| ASMM10P008520 | <b>Pigh</b>        | phosphatidylinositol glycan anchor biosynthesis, class H            | 2.83 | 0.0021492 | 209625_at   | PIGH     | -2.5  | 0.00017  |
| ASMM10P044186 | <b>Pdk3</b>        | pyruvate dehydrogenase kinase, isoenzyme 3                          | 2.79 | 0.0018319 | 230085_at   | PKD3     | -2.4  | 0.03499  |
| ASMM10P031711 | <b>Lyar</b>        | Ly1 antibody reactive clone                                         | 2.79 | 0.0228302 | 223413_s_at | LYAR     | -2.01 | 0.00091  |
| ASMM10P006636 | <b>Daf2</b>        | decay accelerating factor 2                                         | 2.58 | 0.0406508 | 201925_s_at | CD55     | -2.37 | 1.00E-04 |
| ASMM10P026916 | <b>B4galt1</b>     | UDP-Gal:betaGlcNAc beta 1,4- galactosyltransferase, polypeptid      | 2.36 | 0.0248671 | 229403_at   | B4GALT1  | -2.21 | 0.0161   |
| ASMM10P000414 | <b>Slc8a1</b>      | solute carrier family 8 (sodium/calcium exchanger), member 1        | 2.35 | 0.0067599 | 235518_at   | SLC8A1   | -9.25 | 0.00011  |
| ASMM10P042070 | <b>Cldn18</b>      | claudin 18                                                          | 2.24 | 0.0407458 | 232578_at   | CLDN18   | -2.76 | 0.00058  |
| ASMM10P055093 | <b>Gm13889</b>     | predicted gene 13889                                                | 2.19 | 0.0080369 | 227099_s_at | C11orf96 | -2.03 | 0.01409  |
| ASMM10P053322 | <b>4933411K20l</b> | RIKEN cDNA 4933411K20 gene                                          | 2.04 | 0.0389594 | 230567_at   | KIAA1430 | -2.17 | 0.0074   |
| ASMM10P030243 | <b>Tyms</b>        | thymidylate synthase                                                | 2.02 | 0.0466357 | 1554696_s_a | TYMS     | -2.1  | 0.02143  |



|               |                  |                                                              |       |           |             |          |      |          |
|---------------|------------------|--------------------------------------------------------------|-------|-----------|-------------|----------|------|----------|
| ASMM10P046718 | <b>Fat2</b>      | FAT tumor suppressor homolog 2 (Drosophila)                  | -2.02 | 0.0363304 | 208153_s_at | FAT2     | 2.01 | 0.02442  |
| ASMM10P039033 | <b>Frk</b>       | fyn-related kinase                                           | -2.02 | 0.0227679 | 235924_at   | N73742   | 2.31 | 0.00379  |
| ASMM10P017925 | <b>Ablim3</b>    | actin binding LIM protein family, member 3                   | -2.05 | 0.031373  | 205730_s_at | ABLIM3   | 4.23 | 0.00021  |
| ASMM10P007946 | <b>Pdzk1ip1</b>  | PDZK1 interacting protein 1                                  | -2.05 | 0.0169408 | 1553589_a_a | PDZK1IP1 | 2.02 | 0.01489  |
| ASMM10P053126 | <b>Tead2</b>     | TEA domain family member 2                                   | -2.06 | 0.0200521 | 226408_at   | TEAD2    | 2.61 | 0.01421  |
| ASMM10P047175 | <b>Ngef</b>      | neuronal guanine nucleotide exchange factor                  | -2.08 | 0.0136808 | 227240_at   | NGEF     | 2.08 | 0.00323  |
| ASMM10P018456 | <b>Sh3rf2</b>    | SH3 domain containing ring finger 2                          | -2.09 | 0.0218509 | 243582_at   | SH3RF2   | 3.83 | 2.00E-05 |
| ASMM10P046827 | <b>Slc47a2</b>   | solute carrier family 47, member 2                           | -2.12 | 0.0468783 | 231068_at   | SLC47A2  | 3.61 | 0.00311  |
| ASMM10P009334 | <b>Nmnat2</b>    | nicotinamide nucleotide adenyltransferase 2                  | -2.16 | 0.0220768 | 1552712_a_a | NMNAT2   | 2.41 | 0.01638  |
| ASMM10P033990 | <b>St8sia1</b>   | ST8 alpha-N-acetyl-neuraminide alpha-2,8-sialyltransferase 1 | -2.18 | 0.045462  | 210073_at   | ST8SIA1  | 2.28 | 0.00262  |
| ASMM10P004992 | <b>Bean1</b>     | brain expressed, associated with Nedd4, 1                    | -2.20 | 0.0057153 | 214068_at   | BEAN1    | 2.14 | 0.00478  |
| ASMM10P042893 | <b>Stra6</b>     | stimulated by retinoic acid gene 6                           | -2.25 | 0.0196125 | 221701_s_at | STRA6    | 2.66 | 0.00108  |
| ASMM10P034463 | <b>Gpnmb</b>     | glycoprotein (transmembrane) nmb                             | -2.30 | 0.0123661 | 1554018_at  | GPNUMB   | 16   | 2.00E-05 |
| ASMM10P008527 | <b>Gpr115</b>    | G protein-coupled receptor 115                               | -2.30 | 0.0076672 | 237690_at   | GPR115   | 3.48 | 1.00E-04 |
| ASMM10P007338 | <b>Tnf</b>       | tumor necrosis factor                                        | -2.37 | 0.0051632 | 207113_s_at | TNF      | 2.46 | 0.00053  |
| ASMM10P013411 | <b>Rims2</b>     | regulating synaptic membrane exocytosis 2                    | -2.43 | 0.0201346 | 229823_at   | RIMS2    | 3.15 | 0.00195  |
| ASMM10P020692 | <b>Scn3a</b>     | sodium channel, voltage-gated, type III, alpha               | -2.43 | 0.0104088 | 210432_s_at | SCN3A    | 2.84 | 0.02159  |
| ASMM10P016962 | <b>Pim1</b>      | proviral integration site 1                                  | -2.49 | 0.0450781 | 209193_at   | PIM1     | 3.29 | 1.00E-05 |
| ASMM10P052004 | <b>Fmo4</b>      | flavin containing monooxygenase 4                            | -2.53 | 0.0136071 | 206263_at   | FMO4     | 2.28 | 0.00582  |
| ASMM10P026413 | <b>Vav3</b>      | vav 3 oncogene                                               | -2.71 | 0.0076537 | 218807_at   | VAV3     | 7.17 | 0.00034  |
| ASMM10P014728 | <b>Runx1</b>     | runt related transcription factor 1                          | -2.87 | 0.0208811 | 210365_at   | RUNX1    | 2.3  | 0.00957  |
| ASMM10P043173 | <b>Ctsh</b>      | cathepsin H                                                  | -2.94 | 0.0107126 | 202295_s_at | CTSH     | 3.27 | 9.00E-05 |
| ASMM10P055664 | <b>Hs3st1</b>    | heparan sulfate (glucosamine) 3-O-sulfotransferase 1         | -3.07 | 0.0017335 | 205466_s_at | HS3ST1   | 2.03 | 0.02889  |
| ASMM10P012590 | <b>Mtss1</b>     | metastasis suppressor 1                                      | -3.14 | 0.001303  | 203037_s_at | MTSS1    | 4.83 | 0.00047  |
| ASMM10P003034 | <b>Mx1</b>       | myxovirus (influenza virus) resistance 1                     | -3.33 | 0.0024641 | 202086_at   | MX1      | 2.34 | 0.00665  |
| ASMM10P043171 | <b>Rasgrf1</b>   | RAS protein-specific guanine nucleotide-releasing factor 1   | -3.33 | 0.0014739 | 210550_s_at | RASGRF1  | 3.88 | 4.00E-05 |
| ASMM10P013160 | <b>Krt75</b>     | keratin 75                                                   | -3.34 | 0.0046238 | 207065_at   | KRT75    | 4.93 | 0.00057  |
| ASMM10P038704 | <b>Hs3st2</b>    | heparan sulfate (glucosamine) 3-O-sulfotransferase 2         | -3.38 | 0.004126  | 219697_at   | HS3ST2   | 2.64 | 0.00102  |
| ASMM10P053679 | <b>Chil1</b>     | chitinase-like 1                                             | -3.46 | 0.0027211 | 209395_at   | CHI3L1   | 5.08 | 0.00545  |
| ASMM10P005813 | <b>Cd44</b>      | CD44 antigen                                                 | -3.53 | 0.0017569 | 217523_at   | CD44     | 2.62 | 0.00099  |
| ASMM10P054918 | <b>Loxl4</b>     | lysyl oxidase-like 4                                         | -3.67 | 0.0047882 | 227145_at   | LOXL4    | 2.63 | 0.00381  |
| ASMM10P029984 | <b>Hes2</b>      | hairy and enhancer of split 2 (Drosophila)                   | -3.74 | 0.0108919 | 231928_at   | HES2     | 3.67 | 0.01278  |
| ASMM10P024849 | <b>Gria2</b>     | glutamate receptor, ionotropic, AMPA2 (alpha 2)              | -3.77 | 0.0017491 | 205358_at   | GRIA2    | 2.06 | 0.00059  |
| ASMM10P017820 | <b>Jakmip2</b>   | janus kinase and microtubule interacting protein 2           | -3.87 | 0.0238818 | 205888_s_at | JAKMIP2  | 2.05 | 0.01565  |
| ASMM10P019821 | <b>Ifit3</b>     | interferon-induced protein with tetratricopeptide repeats 3  | -3.87 | 0.0012731 | 229450_at   | IFIT3    | 3.45 | 2.00E-05 |
| ASMM10P050390 | <b>Serpina1a</b> | serine (or cysteine) peptidase inhibitor, clade A, member 1A | -3.92 | 0.0011933 | 230318_at   | SERPINA1 | 2.27 | 0.00614  |
| ASMM10P017859 | <b>Lox</b>       | lysyl oxidase                                                | -3.94 | 0.0394524 | 215446_s_at | LOX      | 2.23 | 0.00388  |
| ASMM10P018571 | <b>Csf1r</b>     | colony stimulating factor 1 receptor                         | -4.03 | 0.0034883 | 203104_at   | CSF1R    | 2.63 | 0.00231  |
| ASMM10P011679 | <b>Il17rd</b>    | interleukin 17 receptor D                                    | -4.23 | 0.0031068 | 227997_at   | IL17RD   | 2.01 | 0.00123  |
| ASMM10P022899 | <b>Scn2a1</b>    | sodium channel, voltage-gated, type II, alpha 1              | -4.59 | 0.0048393 | 229057_at   | SCN2A    | 2.56 | 0.04753  |
| ASMM10P009394 | <b>Ifitm10</b>   | interferon induced transmembrane protein 10                  | -5.17 | 0.0033721 | 227863_at   | IFITM10  | 2.38 | 0.04561  |
| ASMM10P037845 | <b>Klk6</b>      | kallikrein related-peptidase 6                               | -5.20 | 0.0061439 | 204733_at   | KLK6     | 3.98 | 2.00E-05 |
| ASMM10P029173 | <b>Ror1</b>      | receptor tyrosine kinase-like orphan receptor 1              | -5.35 | 0.0011487 | 232060_at   | ROR1     | 2.03 | 0.0211   |
| ASMM10P002415 | <b>L1cam</b>     | L1 cell adhesion molecule                                    | -5.38 | 0.0005547 | 204584_at   | L1CAM    | 2.75 | 0.01583  |
| ASMM10P042698 | <b>Scn3b</b>     | sodium channel, voltage-gated, type III, beta                | -5.51 | 0.0018236 | 204723_at   | SCN3B    | 2.52 | 0.00298  |
| ASMM10P052346 | <b>Akr1c21</b>   | aldo-keto reductase family 1, member C21                     | -5.68 | 0.0032528 | 217626_at   | AKR1C1   | 3    | 0.00137  |
| ASMM10P025788 | <b>Dusp10</b>    | dual specificity phosphatase 10                              | -5.91 | 0.001261  | 215501_s_at | DUSP10   | 2.33 | 0.00032  |

|               |                 |                                                                          |         |           |             |          |       |          |
|---------------|-----------------|--------------------------------------------------------------------------|---------|-----------|-------------|----------|-------|----------|
| ASMM10P034924 | <b>Lrrn1</b>    | leucine rich repeat protein 1, neuronal                                  | -5.93   | 0.0062193 | 226884_at   | LRRN1    | 2.79  | 8.00E-05 |
| ASMM10P053862 | <b>Grik2</b>    | glutamate receptor, ionotropic, kainate 2 (beta 2)                       | -5.93   | 0.0043846 | 213845_at   | GRIK2    | 2.05  | 0.00074  |
| ASMM10P020839 | <b>AA986860</b> | expressed sequence AA986860                                              | -5.96   | 0.000341  | 219476_at   | C1orf116 | 2.47  | 0.00197  |
| ASMM10P032914 | <b>Gpr37</b>    | G protein-coupled receptor 37                                            | -6.26   | 0.0329451 | 209631_s_at | GPR37    | 2.05  | 0.02429  |
| ASMM10P052209 | <b>Atp1b1</b>   | ATPase, Na <sup>+</sup> /K <sup>+</sup> transporting, beta 1 polypeptide | -6.57   | 0.0017782 | 201242_s_at | ATP1B1   | 2.09  | 0.00895  |
| ASMM10P029019 | <b>Lurap1l</b>  | leucine rich adaptor protein 1-like                                      | -7.42   | 0.0016766 | 227443_at   | LURAP1L  | 2.73  | 0.00655  |
| ASMM10P052378 | <b>Lyst</b>     | lysosomal trafficking regulator                                          | -8.35   | 0.0063375 | 203518_at   | LYST     | 2.21  | 0.00093  |
| ASMM10P037844 | <b>Klk7</b>     | kallikrein related-peptidase 7 (chymotryptic, stratum corneum)           | -8.74   | 0.000376  | 239381_at   | KLK7     | 5.24  | 0.00023  |
| ASMM10P055807 | <b>Gper1</b>    | G protein-coupled estrogen receptor 1                                    | -8.77   | 0.0012068 | 210640_s_at | GPER     | 2.89  | 8.00E-05 |
| ASMM10P027458 | <b>Kank4</b>    | KN motif and ankyrin repeat domains 4                                    | -8.82   | 0.0012715 | 229125_at   | KANK4    | 16.06 | 0        |
| ASMM10P025449 | <b>Dapp1</b>    | dual adaptor for phosphotyrosine and 3-phosphoinositides 1               | -10.02  | 0.0005713 | 222859_s_at | DAPP1    | 2.09  | 0.00312  |
| ASMM10P026795 | <b>Atp6v0d2</b> | ATPase, H <sup>+</sup> transporting, lysosomal V0 subunit D2             | -10.62  | 0.0060794 | 1553153_at  | ATP6V0D2 | 2.18  | 0.02069  |
| ASMM10P025586 | <b>Lrrc7</b>    | leucine rich repeat containing 7                                         | -11.14  | 0.0002523 | 233499_at   | LRRC7    | 2.31  | 0.02334  |
| ASMM10P032656 | <b>Lfng</b>     | LFNG O-fucosylpeptide 3-beta-N-acetylglucosaminyltransferase             | -12.33  | 0.000401  | 228762_at   | LFNG     | 2.44  | 0.00201  |
| ASMM10P040613 | <b>Rasd2</b>    | RASD family, member 2                                                    | -14.32  | 0.0028108 | 223634_at   | RASD2    | 2.3   | 0.00523  |
| ASMM10P002012 | <b>Pdzk1</b>    | PDZ domain containing 1                                                  | -15.77  | 4.77E-05  | 205380_at   | PDZK1    | 3.21  | 0.0207   |
| ASMM10P036964 | <b>Klf7</b>     | Kruppel-like factor 7 (ubiquitous)                                       | -18.91  | 0.0023523 | 238517_at   | KLF7     | 2.47  | 0.00165  |
| ASMM10P015554 | <b>Slc22a3</b>  | solute carrier family 22 (organic cation transporter), member 3          | -24.51  | 0.004432  | 205421_at   | SLC22A3  | 4.12  | 2.00E-05 |
| ASMM10P014447 | <b>BC016579</b> | cDNA sequence, BC016579                                                  | -27.15  | 0.0022393 | 1559021_at  | C3orf52  | 2.72  | 0.00756  |
| ASMM10P042115 | <b>Acpp</b>     | acid phosphatase, prostate                                               | -41.13  | 0.0039846 | 204393_s_at | ACPP     | 2.06  | 0.00135  |
| ASMM10P008650 | <b>Synpo2</b>   | synaptopodin 2                                                           | -58.59  | 4.77E-05  | 225720_at   | SYNPO2   | 2.09  | 0.00858  |
| ASMM10P045844 | <b>Map7d2</b>   | MAP7 domain containing 2                                                 | -223.84 | 5.74E-05  | 228262_at   | MAP7D2   | 3     | 3.00E-05 |

**Table S2: The top 15 enriched oncogenic signatures in the CRT1-MAML2-induced murine MEC vs. normal salivary gland tissues are shown.**

| <b>RANK</b> | <b>Top enriched oncogenic signature</b>                                                                               | <b>MSigDB gene set</b>             | <b>SIZE</b> | <b>ES</b> | <b>NES</b> | <b>FDR q-val</b> |
|-------------|-----------------------------------------------------------------------------------------------------------------------|------------------------------------|-------------|-----------|------------|------------------|
| 1           | RB1/RBL1 loss-induced signature                                                                                       | RB_P107_DN.V1_UP                   | 117         | 0.53      | 2.08       | 0                |
| 2           | VEGF-induced signature                                                                                                | VEGF_A_UP.V1_DN                    | 161         | 0.5       | 2.07       | 0                |
| 3           | Late serum response signature                                                                                         | CSR_LATE_UP.V1_UP                  | 134         | 0.5       | 2.05       | 0                |
| 4           | Oncogenic KRAS induced signature                                                                                      | KRAS.DF.V1_UP                      | 164         | 0.48      | 2          | 0                |
| 5           | cAMP-induced signature                                                                                                | CAMP_UP.V1_UP                      | 158         | 0.46      | 1.89       | 0.001            |
| 6           | YAP conserved signature                                                                                               | CORDENONSI_YAP_CONSERVED_SIGNATURE | 53          | 0.53      | 1.89       | 0.001            |
| 7           | Shh-induced signature                                                                                                 | GCNP_SHH_UP_LATE.V1_UP             | 144         | 0.46      | 1.88       | 0.001            |
| 8           | EIF4G1 regulated signature                                                                                            | SIRNA_EIF4GI_DN                    | 72          | 0.5       | 1.84       | 0.002            |
| 9           | Down-regulated gene signature during early stages of differentiation of embryoid bodies                               | ESC_V6.5_UP_EARLY.V1_DN            | 143         | 0.44      | 1.82       | 0.003            |
| 10          | Down-regulated gene signature in breast cancer positive for ESR1 vs long-term adapted for estrogen-independent growth | LTE2_UP.V1_DN                      | 149         | 0.43      | 1.79       | 0.003            |
| 11          | TBK1-induced signature                                                                                                | TBK1.DF_DN                         | 235         | 0.41      | 1.77       | 0.004            |
| 12          | Oncogenic EGFR-induced signature                                                                                      | EGFR_UP.V1_UP                      | 151         | 0.43      | 1.74       | 0.005            |
| 13          | ES cell differentiation-inhibited signature                                                                           | ESC_V6.5_UP_LATE.V1_DN             | 147         | 0.42      | 1.74       | 0.004            |
| 14          | SNF5-inhibited signature                                                                                              | SNF5_DN.V1_UP                      | 149         | 0.42      | 1.73       | 0.004            |
| 15          | ES cell differentiation-inhibited signature                                                                           | ESC_J1_UP_LATE.V1_DN               | 146         | 0.42      | 1.72       | 0.005            |

**Table S3: A list of differentially expressed genes in the CRT1-MAML2-induced murine MEC show overlaps with the CDK4/6-RB integrated signature and/or the RB1/RBL1 loss-induced gene set.** \*Differentially expressed genes in mouse MEC vs normal salivary gland tissues were defined using cut-off criteria of absolute fold change of  $\geq 2.0$  and FDR p value of  $\leq 0.05$ . These genes were compared with the CDK4/6-RB integrated signature (Knudsen et al, 2020) and RB\_P107\_DN.V1\_up gene set (Molecular signature database). Red: upregulated; blue: down-regulated.

| ProbeName     | GeneName | Gene description                                          | Fold Change (Tumor/Normal) | FDR p-value | CDK4/6-RB integrated signature | geneset RB_P107_DN.V1_UP |
|---------------|----------|-----------------------------------------------------------|----------------------------|-------------|--------------------------------|--------------------------|
| ASMM10P006922 | Birc5    | baculoviral IAP repeat-containing 5                       | 138.95                     | 0.0017      | BIRC5                          |                          |
| ASMM10P019843 | Kif11    | kinesin family member 11                                  | 66.29                      | 0.0015      | KIF11                          |                          |
| ASMM10P036956 | Kif22    | kinesin family member 22                                  | 62.49                      | 0.0019      | KIF22                          |                          |
| ASMM10P006949 | Ccna2    | cyclin A2                                                 | 61.76                      | 0.0032      | CCNA2                          |                          |
| ASMM10P048998 | Spag5    | sperm associated antigen 5                                | 57.86                      | 0.0008      | SPAG5                          |                          |
| ASMM10P006734 | Mcm6     | minichromosome maintenance deficient 6 (MIS5 homolog)     | 56.38                      | 0.0010      | MCM6                           | MCM6                     |
| ASMM10P041709 | Kif23    | kinesin family member 23                                  | 45.43                      | 0.0021      | KIF23                          |                          |
| ASMM10P008811 | Dlgap5   | discs, large (Drosophila) homolog-associated protein 5    | 44.56                      | 0.0012      | DLGAP5                         |                          |
| ASMM10P049620 | Mcm3     | minichromosome maintenance deficient 3 (S. cerevisiae)    | 44.24                      | 0.0011      | MCM3                           |                          |
| ASMM10P011830 | Cdkn3    | cyclin-dependent kinase inhibitor 3                       | 41.12                      | 0.0030      | CDKN3                          |                          |
| ASMM10P008087 | Ube2c    | ubiquitin-conjugating enzyme E2C                          | 41.00                      | 0.0010      | UBE2C                          |                          |
| ASMM10P016427 | Ndc80    | NDC80 homolog, kinetochore complex component (S. c)       | 40.71                      | 0.0016      | NDC80                          |                          |
| ASMM10P025023 | Exo1     | exonuclease 1                                             | 39.58                      | 0.0018      | EXO1                           |                          |
| ASMM10P011246 | Cdca2    | cell division cycle associated 2                          | 38.39                      | 0.0017      | CDCA2                          |                          |
| ASMM10P000213 | Prc1     | protein regulator of cytokinesis 1                        | 38.13                      | 0.0022      | PRC1                           | PRC1                     |
| ASMM10P019858 | Hells    | helicase, lymphoid specific                               | 37.94                      | 0.0014      | HELLS                          |                          |
| ASMM10P046554 | Hmmer    | hyaluronan mediated motility receptor (RHAMM)             | 36.03                      | 0.0034      | HMMR                           |                          |
| ASMM10P015707 | Ccnf     | cyclin F                                                  | 34.48                      | 0.0023      |                                | CCNF                     |
| ASMM10P001521 | Tk1      | thymidine kinase 1                                        | 32.95                      | 0.0007      | TK1                            |                          |
| ASMM10P041853 | Ccnb2    | cyclin B2                                                 | 32.83                      | 0.0020      | CCNB2                          |                          |
| ASMM10P050862 | Lrr1     | leucine rich repeat protein 1                             | 32.61                      | 0.0009      | LRR1                           |                          |
| ASMM10P027685 | Cdc20    | cell division cycle 20                                    | 32.02                      | 0.0039      | CDC20                          |                          |
| ASMM10P048341 | Slit3    | slit homolog 3 (Drosophila)                               | 31.97                      | 0.0001      |                                | SLIT3                    |
| ASMM10P025819 | Plk4     | polo-like kinase 4                                        | 31.34                      | 0.0002      | PLK4                           |                          |
| ASMM10P039379 | Neil3    | nei like 3 (E. coli)                                      | 30.85                      | 0.0016      | NEIL3                          |                          |
| ASMM10P043142 | Ttk      | Ttk protein kinase                                        | 29.56                      | 0.0010      | TTK                            |                          |
| ASMM10P031586 | Cenpa    | centromere protein A                                      | 29.39                      | 0.0009      | CENPA                          |                          |
| ASMM10P023597 | Nusap1   | nucleolar and spindle associated protein 1                | 28.97                      | 0.0010      | NUSAP1                         |                          |
| ASMM10P003012 | Tk1      | thymidine kinase 1                                        | 27.93                      | 0.0006      | TK1                            |                          |
| ASMM10P050688 | Rrm2     | ribonucleotide reductase M2                               | 26.03                      | 0.0013      | RRM2                           | RRM2                     |
| ASMM10P052191 | Ccnb1    | cyclin B1                                                 | 25.77                      | 0.0031      | CCNB1                          |                          |
| ASMM10P009599 | Dscc1    | defective in sister chromatid cohesion 1 homolog (S. cer) | 25.68                      | 0.0020      | DSCC1                          |                          |
| ASMM10P018536 | Lmnb1    | lamin B1                                                  | 25.49                      | 0.0017      | LMNB1                          |                          |
| ASMM10P037068 | Mki67    | antigen identified by monoclonal antibody Ki 67           | 24.41                      | 0.0056      | MKI67                          |                          |
| ASMM10P000899 | Fanci    | Fanconi anemia, complementation group I                   | 24.35                      | 0.0014      | FANCI                          |                          |
| ASMM10P015943 | Kifc1    | kinesin family member C1                                  | 23.52                      | 0.0016      | KIFC1                          |                          |
| ASMM10P020242 | Mastl    | microtubule associated serine/threonine kinase-like       | 23.43                      | 0.0006      | MASTL                          |                          |
| ASMM10P053345 | Haus8    | 4HAUS augmin-like complex, subunit 8                      | 22.99                      | 0.0003      | HAUS8                          | HAUS8                    |
| ASMM10P005436 | Timeless | timeless circadian clock 1                                | 22.55                      | 0.0009      | TIMELESS                       |                          |
| ASMM10P050073 | Pole2    | polymerase (DNA directed), epsilon 2 (p59 subunit)        | 22.51                      | 0.0012      | POLE2                          | POLE2                    |
| ASMM10P006950 | Ccne2    | cyclin E2                                                 | 22.35                      | 0.0022      | CCNE2                          | CCNE2                    |
| ASMM10P049219 | Col1a1   | collagen, type I, alpha 1                                 | 21.50                      | 0.0002      |                                | COL1A1                   |
| ASMM10P029650 | Rpa2     | replication protein A2                                    | 21.23                      | 0.0014      |                                | RPA2                     |
| ASMM10P037372 | Lig1     | ligase I, DNA, ATP-dependent                              | 21.03                      | 0.0007      | LIG1                           | LIG1                     |
| ASMM10P053525 | Ttk      | Ttk protein kinase                                        | 20.95                      | 0.0017      | TTK                            |                          |
| ASMM10P010448 | Dhfr     | dihydrofolate reductase                                   | 20.25                      | 0.0018      | DHFR                           | DHFR                     |
| ASMM10P027805 | Cdca8    | cell division cycle associated 8                          | 19.92                      | 0.0053      | CDCA8                          |                          |
| ASMM10P021799 | Ube2t    | ubiquitin-conjugating enzyme E2T (putative)               | 19.90                      | 0.0004      | UBE2T                          |                          |
| ASMM10P033815 | Rad51ap  | RAD51 associated protein 1                                | 19.80                      | 0.0014      | RAD51AP1                       |                          |
| ASMM10P025273 | Gpsm2    | G-protein signalling modulator 2 (AGS3-like, C. elegans)  | 19.73                      | 0.0016      | GPSM2                          |                          |
| ASMM10P038436 | Rrm1     | ribonucleotide reductase M1                               | 19.21                      | 0.0003      |                                | RRM1                     |
| ASMM10P054508 | Ranbp1   | RAN binding protein 1                                     | 19.04                      | 0.0010      | RANBP1                         |                          |
| ASMM10P010564 | Depdc1b  | DEP domain containing 1B                                  | 18.62                      | 0.0031      | DEPDC1B                        |                          |
| ASMM10P053814 | Rpa1     | replication protein A1                                    | 17.87                      | 0.0016      |                                | RPA1                     |
| ASMM10P004473 | Mfge8    | milk fat globule-EGF factor 8 protein                     | 17.87                      | 0.0057      |                                | MFGE8                    |

|               |          |                                                                 |       |        |        |          |
|---------------|----------|-----------------------------------------------------------------|-------|--------|--------|----------|
| ASMM10P046014 | E2f7     | E2F transcription factor 7                                      | 17.86 | 0.0021 | E2F7   |          |
| ASMM10P023472 | Kif18a   | kinesin family member 18A                                       | 17.75 | 0.0006 | KIF18A |          |
| ASMM10P031648 | Tacc3    | transforming, acidic coiled-coil containing protein 3           | 17.70 | 0.0014 | TACC3  |          |
| ASMM10P004751 | Cenpw    | centromere protein W                                            | 16.34 | 0.0031 | CENPW  |          |
| ASMM10P015787 | Dusp1    | dual specificity phosphatase 1                                  | 16.33 | 0.0020 |        | DUSP1    |
| ASMM10P031217 | Mcm7     | minichromosome maintenance deficient 7 ( <i>S. cerevisiae</i> ) | 15.72 | 0.0009 | MCM7   | MCM7     |
| ASMM10P034073 | Col1a2   | collagen, type I, alpha 2                                       | 15.49 | 0.0003 |        | COL1A2   |
| ASMM10P008278 | Cenpn    | centromere protein N                                            | 15.05 | 0.0005 | CENPN  |          |
| ASMM10P021580 | Pcna     | proliferating cell nuclear antigen                              | 14.90 | 0.0004 | PCNA   | PCNA     |
| ASMM10P049741 | Anapc11  | anaphase promoting complex subunit 11                           | 14.35 | 0.0003 |        | ANAPC11  |
| ASMM10P036029 | Pold1    | polymerase (DNA directed), delta 1, catalytic subunit           | 14.12 | 0.0026 | POLD1  | POLD1    |
| ASMM10P007879 | Spc25    | SPC25, NDC80 kinetochore complex component, homo                | 13.54 | 0.0010 | SPC25  |          |
| ASMM10P026895 | Fbxo5    | F-box protein 5                                                 | 13.45 | 0.0012 | FBXO5  |          |
| ASMM10P004448 | Oip5     | Opa interacting protein 5                                       | 13.38 | 0.0015 | OIP5   |          |
| ASMM10P035964 | Ccne1    | cyclin E1                                                       | 13.10 | 0.0068 |        | CCNE1    |
| ASMM10P031967 | Dck      | deoxycytidine kinase                                            | 12.87 | 0.0028 | DCK    |          |
| ASMM10P015438 | Chaf1b   | chromatin assembly factor 1, subunit B (p60)                    | 12.82 | 0.0012 | CHAF1B | CHAF1B   |
| ASMM10P040706 | Orc6     | origin recognition complex, subunit 6                           | 12.26 | 0.0036 | ORC6   | ORC6     |
| ASMM10P014139 | Mcm4     | minichromosome maintenance deficient 4 homolog ( <i>S. c</i>    | 11.91 | 0.0023 | MCM4   |          |
| ASMM10P052864 | Mad2l1   | MAD2 mitotic arrest deficient-like 1                            | 11.84 | 0.0005 | MAD2L1 | MAD2L1   |
| ASMM10P032535 | Rfc2     | replication factor C (activator 1) 2                            | 11.78 | 0.0008 | RFC2   | RFC2     |
| ASMM10P003125 | Rfc3     | replication factor C (activator 1) 3                            | 11.20 | 0.0003 | RFC3   | RFC3     |
| ASMM10P046297 | H2afv    | H2A histone family, member V                                    | 11.07 | 0.0005 |        | H2AZ2    |
| ASMM10P007403 | Incenp   | inner centromere protein                                        | 10.99 | 0.0007 | INCENP | INCENP   |
| ASMM10P032431 | Kntc1    | kinetochore associated 1                                        | 10.91 | 0.0034 | KNTC1  |          |
| ASMM10P004239 | Fancd2   | Fanconi anemia, complementation group D2                        | 10.78 | 0.0006 | FANCD2 |          |
| ASMM10P034865 | Fbln2    | fibulin 2                                                       | 10.77 | 0.0086 |        | FBLN2    |
| ASMM10P045214 | Bgn      | biglycan                                                        | 10.50 | 0.0028 |        | BGN      |
| ASMM10P047924 | Lgals3bp | lectin, galactoside-binding, soluble, 3 binding protein         | 10.40 | 0.0011 |        | LGALS3BP |
| ASMM10P051291 | Siva1    | SIVA1, apoptosis-inducing factor                                | 10.35 | 0.0002 |        | SIVA1    |
| ASMM10P013921 | Tuba1c   | tubulin, alpha 1C                                               | 10.26 | 0.0006 | TUBA1C |          |
| ASMM10P055322 | S100a4   | S100 calcium binding protein A4                                 | 10.06 | 0.0010 |        | S100A4   |
| ASMM10P052751 | Cks2     | CDC28 protein kinase regulatory subunit 2                       | 9.90  | 0.0009 | CKS2   |          |
| ASMM10P053793 | Cenpl    | centromere protein L                                            | 9.70  | 0.0005 | CENPL  |          |
| ASMM10P005417 | Orc6     | origin recognition complex, subunit 6                           | 9.55  | 0.0066 | ORC6   | ORC6     |
| ASMM10P009237 | Plk4     | polo-like kinase 4                                              | 9.43  | 0.0006 | PLK4   |          |
| ASMM10P004742 | Dtymk    | deoxythymidylate kinase                                         | 9.25  | 0.0004 | DTYMK  |          |
| ASMM10P029690 | Stmn1    | stathmin 1                                                      | 9.04  | 0.0032 | STMN1  | STMN1    |
| ASMM10P013495 | Nsmce2   | non-SMC element 2 homolog (MMS21, <i>S. cerevisiae</i> )        | 8.87  | 0.0002 |        | NSMCE2   |
| ASMM10P002874 | Rad51    | RAD51 homolog                                                   | 8.61  | 0.0024 | RAD51  |          |
| ASMM10P038038 | Trpm1    | transient receptor potential cation channel, subfamily N        | 8.26  | 0.0004 |        | TRPM1    |
| ASMM10P008626 | Kifc5b   | kinesin family member C5B                                       | 8.22  | 0.0004 | KIFC1  |          |
| ASMM10P019495 | Cd248    | CD248 antigen, endosialin                                       | 7.82  | 0.0055 |        | CD248    |
| ASMM10P008589 | Bicc1    | bicaudal C homolog 1 ( <i>Drosophila</i> )                      | 7.74  | 0.0009 |        | BICC1    |
| ASMM10P051995 | Trip13   | thyroid hormone receptor interactor 13                          | 7.73  | 0.0028 | TRIP13 |          |
| ASMM10P017150 | Nrm      | nurim (nuclear envelope membrane protein)                       | 7.54  | 0.0043 |        | NRM      |
| ASMM10P012579 | Atad2    | ATPase family, AAA domain containing 2                          | 7.31  | 0.0012 | ATAD2  |          |
| ASMM10P006814 | Bex1     | brain expressed gene 1                                          | 7.24  | 0.0306 |        | BEX2     |
| ASMM10P053240 | Coro1a   | coronin, actin binding protein 1A                               | 7.12  | 0.0547 | CORO1A |          |
| ASMM10P055129 | Fbn1     | fibrillin 1                                                     | 6.85  | 0.0051 |        | FBN1     |
| ASMM10P030881 | Tmem11   | transmembrane protein 119                                       | 6.74  | 0.0014 |        | TMEM119  |
| ASMM10P041672 | Loxl1    | lysyl oxidase-like 1                                            | 6.69  | 0.0067 |        | LOXL1    |
| ASMM10P004194 | Vrk1     | vaccinia related kinase 1                                       | 6.61  | 0.0028 | VRK1   |          |
| ASMM10P033486 | Mcm2     | minichromosome maintenance deficient 2 mitotin ( <i>S. c</i>    | 6.55  | 0.0013 | MCM2   | MCM2     |
| ASMM10P018843 | Pola2    | polymerase (DNA directed), alpha 2                              | 6.50  | 0.0032 | POLA2  |          |
| ASMM10P005234 | Siva1    | SIVA1, apoptosis-inducing factor                                | 6.30  | 0.0003 |        | SIVA1    |
| ASMM10P008779 | Tssc4    | tumor-suppressing subchromosomal transferable fragm             | 6.24  | 0.0015 |        | TSSC4    |
| ASMM10P013251 | Nup155   | nucleoporin 155                                                 | 6.10  | 0.0003 | NUP155 |          |
| ASMM10P014857 | Rpl39l   | ribosomal protein L39-like                                      | 6.08  | 0.0046 | RPL39L | RPL39L   |
| ASMM10P000575 | Hexdc    | hexosaminidase (glycosyl hydrolase family 20, catalytic c       | 6.04  | 0.0040 |        | HEXD     |
| ASMM10P000077 | Pttg1    | pituitary tumor-transforming gene 1                             | 6.03  | 0.0023 | PTTG1  |          |
| ASMM10P052540 | Uck2     | uridine-cytidine kinase 2                                       | 5.72  | 0.0019 | UCK2   |          |
| ASMM10P049782 | Cenpo    | centromere protein O                                            | 5.71  | 0.0004 | CENPO  |          |
| ASMM10P051142 | Ubr7     | ubiquitin protein ligase E3 component n-recognin 7 (pu          | 5.67  | 0.0004 |        | UBR7     |

|               |          |                                                           |       |        |          |
|---------------|----------|-----------------------------------------------------------|-------|--------|----------|
| ASMM10P039750 | Cdh11    | cadherin 11                                               | 5.62  | 0.0015 | CDH11    |
| ASMM10P044642 | Prdx4    | peroxiredoxin 4                                           | 5.61  | 0.0014 | PRDX4    |
| ASMM10P028831 | Smc2     | structural maintenance of chromosomes 2                   | 5.49  | 0.0145 | SMC2     |
| ASMM10P001698 | Hmces    | 5-hydroxymethylcytosine (hmC) binding, ES cell specific   | 5.49  | 0.0246 | HMCES    |
| ASMM10P016032 | Tubb5    | tubulin, beta 5 class I                                   | 5.44  | 0.0074 | TUBB     |
| ASMM10P004195 | Vrk1     | vaccinia related kinase 1                                 | 5.18  | 0.0055 | VRK1     |
| ASMM10P048251 | Fancl    | Fanconi anemia, complementation group L                   | 5.05  | 0.0008 | FANCL    |
| ASMM10P012117 | Cenpf    | centromere protein F                                      | 4.95  | 0.0008 | CENPF    |
| ASMM10P031241 | Col6a2   | collagen, type VI, alpha 2                                | 4.80  | 0.0059 | COL6A2   |
| ASMM10P053968 | Prim1    | DNA primase, p49 subunit                                  | 4.77  | 0.0010 | PRIM1    |
| ASMM10P000539 | Timeless | timeless circadian clock 1                                | 4.65  | 0.0086 | TIMELESS |
| ASMM10P055423 | Hexdc    | hexosaminidase (glycosyl hydrolase family 20, catalytic c | 4.64  | 0.0168 | HEXD     |
| ASMM10P028755 | Melk     | maternal embryonic leucine zipper kinase                  | 4.57  | 0.0012 | MELK     |
| ASMM10P013537 | Khdrbs3  | KH domain containing, RNA binding, signal transductor     | 4.50  | 0.0105 | KHDRBS3  |
| ASMM10P037526 | Ethe1    | ethylmalonic encephalopathy 1                             | 4.39  | 0.0025 | ETHE1    |
| ASMM10P009495 | Cenpm    | centromere protein M                                      | 4.38  | 0.0007 | CENPM    |
| ASMM10P041291 | Anln     | anillin, actin binding protein                            | 4.07  | 0.0045 | ANLN     |
| ASMM10P031270 | Col6a1   | collagen, type VI, alpha 1                                | 4.07  | 0.0065 | COL6A1   |
| ASMM10P038984 | Tssc4    | tumor-suppressing subchromosomal transferable fragm       | 4.04  | 0.0021 | TSSC4    |
| ASMM10P015144 | Fstl1    | folliculin-like 1                                         | 3.92  | 0.0038 | FSTL1    |
| ASMM10P011802 | Prim2    | DNA primase, p58 subunit                                  | 3.91  | 0.0024 | PRIM2    |
| ASMM10P014712 | Donson   | downstream neighbor of SON                                | 3.86  | 0.0061 | DONSON   |
| ASMM10P008242 | Syce2    | synaptonemal complex central element protein 2            | 3.82  | 0.0034 | SYCE2    |
| ASMM10P051537 | Gmnn     | geminin                                                   | 3.82  | 0.0062 | GMNN     |
| ASMM10P006739 | Mfge8    | milk fat globule-EGF factor 8 protein                     | 3.77  | 0.0481 | MFG8     |
| ASMM10P013494 | Nsmce2   | non-SMC element 2 homolog (MMS21, S. cerevisiae)          | 3.63  | 0.0090 | NSMCE2   |
| ASMM10P047817 | Dtymk    | deoxythymidylate kinase                                   | 3.61  | 0.0029 | DTYMK    |
| ASMM10P035435 | Ube2s    | ubiquitin-conjugating enzyme E2S                          | 3.58  | 0.0024 | UBE2S    |
| ASMM10P010728 | Dnajc9   | Dnaj (Hsp40) homolog, subfamily C, member 9               | 3.57  | 0.0021 | DNAJC9   |
| ASMM10P007750 | Nuf2     | NUF2, NDC80 kinetochore complex component, homol          | 3.53  | 0.0106 | NUF2     |
| ASMM10P006786 | Pml      | promyelocytic leukemia                                    | 3.52  | 0.0651 | PML      |
| ASMM10P001795 | Fancl    | Fanconi anemia, complementation group L                   | 3.40  | 0.0055 | FANCL    |
| ASMM10P053818 | Serpinf1 | serine (or cysteine) peptidase inhibitor, clade F, member | 3.38  | 0.0149 | SERPINF1 |
| ASMM10P018936 | Fen1     | flap structure specific endonuclease 1                    | 3.36  | 0.0064 | FEN1     |
| ASMM10P015507 | Dynlt1a  | dynein light chain Tctex-type 1A                          | 3.21  | 0.0385 | DYNLT1   |
| ASMM10P022399 | Pdss1    | prenyl (solanesyl) diphosphate synthase, subunit 1        | 3.20  | 0.0017 | PDSS1    |
| ASMM10P041390 | Zwint    | ZW10 interactor                                           | 3.20  | 0.0068 | ZWINT    |
| ASMM10P002597 | Rfc4     | replication factor C (activator 1) 4                      | 3.19  | 0.0050 | RFC4     |
| ASMM10P040449 | Hmgb2    | high mobility group box 2                                 | 3.16  | 0.0039 | HMGB2    |
| ASMM10P000235 | Pcolce   | procollagen C-endopeptidase enhancer protein              | 3.11  | 0.0047 | PCOLCE   |
| ASMM10P040819 | Gins3    | GINS complex subunit 3 (Psf3 homolog)                     | 3.01  | 0.0254 | GINS3    |
| ASMM10P030961 | Rfc5     | replication factor C (activator 1) 5                      | 2.91  | 0.0125 | RFC5     |
| ASMM10P033794 | Ncapd2   | non-SMC condensin I complex, subunit D2                   | 2.89  | 0.0211 | NCAPD2   |
| ASMM10P051187 | Vrk1     | vaccinia related kinase 1                                 | 2.81  | 0.0433 | VRK1     |
| ASMM10P016597 | Dynlt1b  | dynein light chain Tctex-type 1B                          | 2.77  | 0.0529 | DYNLT1   |
| ASMM10P047290 | Prr11    | proline rich 11                                           | 2.75  | 0.0214 | PRR11    |
| ASMM10P030288 | Slbp     | stem-loop binding protein                                 | 2.53  | 0.0084 | SLBP     |
| ASMM10P039176 | Gins4    | GINS complex subunit 4 (Slf5 homolog)                     | 2.50  | 0.0043 | GINS4    |
| ASMM10P030711 | Cdk1     | cyclin-dependent kinase 1                                 | 2.50  | 0.0169 | CDK1     |
| ASMM10P005342 | Fkbp10   | FK506 binding protein 10                                  | 2.39  | 0.0230 | FKBP10   |
| ASMM10P006957 | Cdc25c   | cell division cycle 25C                                   | 2.38  | 0.0233 | CDC25C   |
| ASMM10P005642 | Syce2    | synaptonemal complex central element protein 2            | 2.32  | 0.0723 | SYCE2    |
| ASMM10P032837 | Rpa3     | replication protein A3                                    | 2.20  | 0.0403 | RPA3     |
| ASMM10P054014 | Pttg1    | pituitary tumor-transforming gene 1                       | 2.18  | 0.0123 | PTTG1    |
| ASMM10P052843 | Ezh2     | enhancer of zeste homolog 2 (Drosophila)                  | 2.16  | 0.0077 | EZH2     |
| ASMM10P006425 | Fen1     | flap structure specific endonuclease 1                    | 2.16  | 0.0179 | FEN1     |
| ASMM10P039609 | Rnaseh2  | ribonuclease H2, large subunit                            | 2.08  | 0.0760 | RNASEH2A |
| ASMM10P030243 | Tyms     | thymidylate synthase                                      | 2.02  | 0.0466 | TYMS     |
| ASMM10P017089 | Nelfe    | negative elongation factor complex member E, Rdbp         | -2.08 | 0.0093 | NELFE    |
| ASMM10P012900 | Cenpm    | centromere protein M                                      | -2.13 | 0.0318 | CENPM    |
| ASMM10P021470 | Ncaph    | non-SMC condensin I complex, subunit H                    | -2.21 | 0.0326 | NCAPH    |
| ASMM10P055542 | Lck      | lymphocyte protein tyrosine kinase                        | -2.21 | 0.0241 | LCK      |
| ASMM10P018890 | Naa40    | N(alpha)-acetyltransferase 40, NatD catalytic subunit, hc | -2.24 | 0.0265 | NAA40    |
| ASMM10P041093 | Spire2   | spire homolog 2 (Drosophila)                              | -2.40 | 0.0120 | SPIRE2   |

|               |        |                                                          |         |        |        |
|---------------|--------|----------------------------------------------------------|---------|--------|--------|
| ASMM10P029122 | Tek    | endothelial-specific receptor tyrosine kinase            | -2.40   | 0.0236 | TEK    |
| ASMM10P027997 | Hmgn2  | high mobility group nucleosomal binding domain 2         | -2.41   | 0.0060 | HMG2   |
| ASMM10P024150 | Fam83d | family with sequence similarity 83, member D             | -2.60   | 0.0055 | FAM83D |
| ASMM10P020718 | Spc25  | SPC25, NDC80 kinetochore complex component, homo         | -2.93   | 0.0059 | SPC25  |
| ASMM10P007419 | Cdk2   | cyclin-dependent kinase 2                                | -3.29   | 0.0334 | CDK2   |
| ASMM10P025644 | Car2   | carbonic anhydrase 2                                     | -3.33   | 0.0304 | CA2    |
| ASMM10P001705 | Cdc25b | cell division cycle 25B                                  | -3.45   | 0.0009 | CDC25B |
| ASMM10P002596 | Lrp8   | low density lipoprotein receptor-related protein 8, apol | -3.59   | 0.0075 | LRP8   |
| ASMM10P011088 | Efs    | embryonal Fyn-associated substrate                       | -3.68   | 0.0017 | EFS    |
| ASMM10P000792 | Srpx2  | sushi-repeat-containing protein, X-linked 2              | -3.75   | 0.0026 | SRPX2  |
| ASMM10P027625 | Rad54l | RAD54 like (S. cerevisiae)                               | -3.83   | 0.0036 | RAD54L |
| ASMM10P049384 | Tubg1  | tubulin, gamma 1                                         | -4.03   | 0.0035 | TUBG1  |
| ASMM10P052188 | Cenph  | centromere protein H                                     | -4.07   | 0.0007 | CENPH  |
| ASMM10P014846 | Abat   | 4-aminobutyrate aminotransferase                         | -4.12   | 0.0043 | ABAT   |
| ASMM10P055512 | Kif2c  | kinesin family member 2C                                 | -4.39   | 0.0010 | KIF2C  |
| ASMM10P033393 | Actg2  | actin, gamma 2, smooth muscle, enteric                   | -4.51   | 0.0268 | ACTG2  |
| ASMM10P029154 | Usp1   | ubiquitin specific peptidase 1                           | -4.68   | 0.0046 | USP1   |
| ASMM10P018882 | Vegfb  | vascular endothelial growth factor B                     | -5.80   | 0.0002 | VEGFB  |
| ASMM10P001611 | Pif1   | PIF1 5'-to-3' DNA helicase homolog (S. cerevisiae)       | -8.07   | 0.0713 | PIF1   |
| ASMM10P055361 | Gstm7  | glutathione S-transferase, mu 7                          | -8.39   | 0.0006 | GSTM2  |
| ASMM10P033810 | Kcna1  | potassium voltage-gated channel, shaker-related subfam   | -9.07   | 0.0015 | KCNA1  |
| ASMM10P029720 | E2f2   | E2F transcription factor 2                               | -9.16   | 0.0004 | E2F2   |
| ASMM10P005321 | Figl1  | figletin-like 1                                          | -11.33  | 0.0002 | FIGL1  |
| ASMM10P041374 | Chek1  | checkpoint kinase 1                                      | -11.74  | 0.0004 | CHEK1  |
| ASMM10P010539 | Cenpk  | centromere protein K                                     | -14.01  | 0.0001 | CENPK  |
| ASMM10P012899 | Cenpm  | centromere protein M                                     | -14.80  | 0.0001 | CENPM  |
| ASMM10P038765 | Hirip3 | HIRA interacting protein 3                               | -30.29  | 0.0002 | HIRIP3 |
| ASMM10P006959 | Cdc45  | cell division cycle 45                                   | -162.17 | 0.0001 | CDC45  |

**Table S4: Primer sequences used for the qRT-PCR analysis in this study.** \*The primer sequences were presented in the 5' to 3' direction.

| <b>Genes</b> | <b>Forward primer</b>    | <b>Reverse primer</b>    | <b>Amplicon (bp)</b> |
|--------------|--------------------------|--------------------------|----------------------|
| CRTC1-MAML2  | TTCGAGGAGGTCATGAAGGA     | TTGCTGTTGGCAGGAGATAG     | 101                  |
| LINC00473    | AAACGCGAACGTGAGCCCCG     | CGCCATGCTCTGGCGCAGTT     | 134                  |
| GAPDH        | CAATGACCCCTTCATTGACC     | GACAAGCTTCCCGTTCTCAG     | 106                  |
| Areg         | GGTCTTAGGCTCAGGCCATT     | TGGTCCCCAGAAAGCGATTC     | 84                   |
| Nr4a2        | GAGCTGGGCTGCTCGAC        | AAGGCATGGCTTCAGCAGAG     | 197                  |
| Mcm6         | TCGTCTCACACACTACGATCAC   | GGCTAAGGGTAGGACAGCAC     | 185                  |
| Prc1         | GGAGCAAGAACTCCGTGACA     | TCACGCCTCGATTCTTTG       | 135                  |
| Rrm2         | TGGAGCTGGGTTTTAACAAGATTT | TCAGCGAAGAACACACGATCA    | 199                  |
| Haus8        | AAAAAGGTTTCTGGAGCGGC     | TCACTTGGCTCTTCTCTGTC     | 91                   |
| Pole2        | CAAGTATCCACCAAAGTAGCCGTT | ACCCTTTGTCTGAATTCCTGTGT  | 121                  |
| Ccne2        | ATTTGGCTTTGCTGAATGAAGT   | TCCAGGTTGTTAACTTCAGTGTT  | 143                  |
| Lig1         | CCCACAAAGTCCCCTGAGTC     | AACTGCTCAGTGTCTTGCCA     | 136                  |
| Dhfr         | TAAACTTCTCCCAGAATACCCAG  | GAGGGAGCAGAGAACTTGAAA    | 127                  |
| Mcm7         | ACAGATGGCACAGGGCTTAC     | AAGCGCCAGCTTCTCATAG      | 158                  |
| Pcna         | TGAACCTCACCAGCATGTCC     | TCTGGGATTCCAAGTTGCTCC    | 181                  |
| Hprt         | CTGGTGAAAAGGACCTCTCGAAG  | CCAGTTTCACTAATGACACAAACG | 141                  |
